# Supplementary material for: Synthesis of an arrayed sgRNA library targeting the human genome
Source: PubMed Central journal article supplement (PMC4597219; doi:10.1038/srep14987), 2015-10-08
Supplement: srep14987-s1.pdf [file srep14987-s1.pdf]

# Synthesis of an arrayed sgRNA library targeting the human genome

Tobias Schmidt<sup>1,+</sup>, Jonathan L. Schmid-Burgk<sup>1,+</sup>, and Veit Hornung<sup>1,\*</sup>

<sup>1</sup> Institute of Molecular Medicine, University Hospital, University of Bonn, Sigmund-Freud-Str. 25, 53127 Bonn, Germany.

<sup>+</sup> T.S. and J.L. S.-B. contributed equally to this work

<sup>\*</sup> Correspondence should be addressed to V.H. ([veit.hornung@uni-bonn.de](mailto:veit.hornung@uni-bonn.de))

## Supplementary Material

**Supplementary Figures 1-8**

**Supplementary Notes**

**Supplementary Methods**

**Supplementary Tables 1, 2, 5, 6 and 7**

**Supplementary Tables 3 and 4 (see additional XLS spreadsheets)**

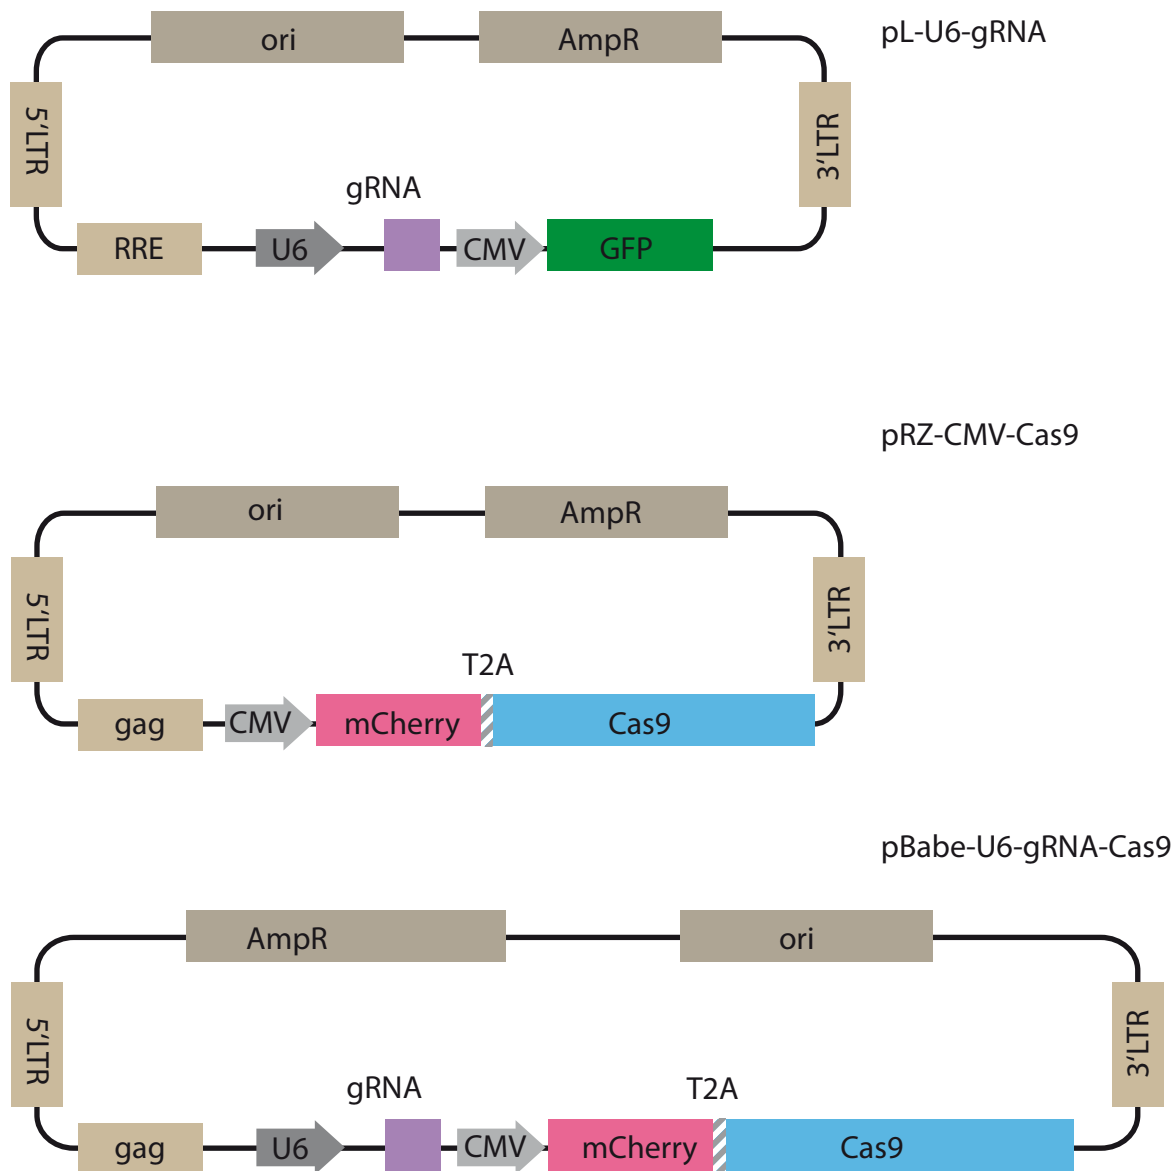

**Supplementary Figure S1 | CRISPR/Cas9 Vectors.** Depicted are three different vector: pL-U6-gRNA contains a LIC ready sgRNA cassette driven by a U6 promoter, followed by a CMV promoter-driven GFP cassette. pRZ-CMV-Cas9 contains an mCherry-Cas9 cassette that is separate by a T2A peptide and driven by a CMV promoter. pBabe-U6-gRNA-Cas9 contains both a LIC ready sgRNA cassette driven by a u6 promoter and a mCherry-Cas9 cassette that is separated by a T2A peptide and is under control of a CMV promoter. pL-U6-gRNA additionally contains lentiviral packaging elements while pRZ-CMV-Cas9 and pBabe-U6-gRNA-Cas9 contain retroviral packaging elements.

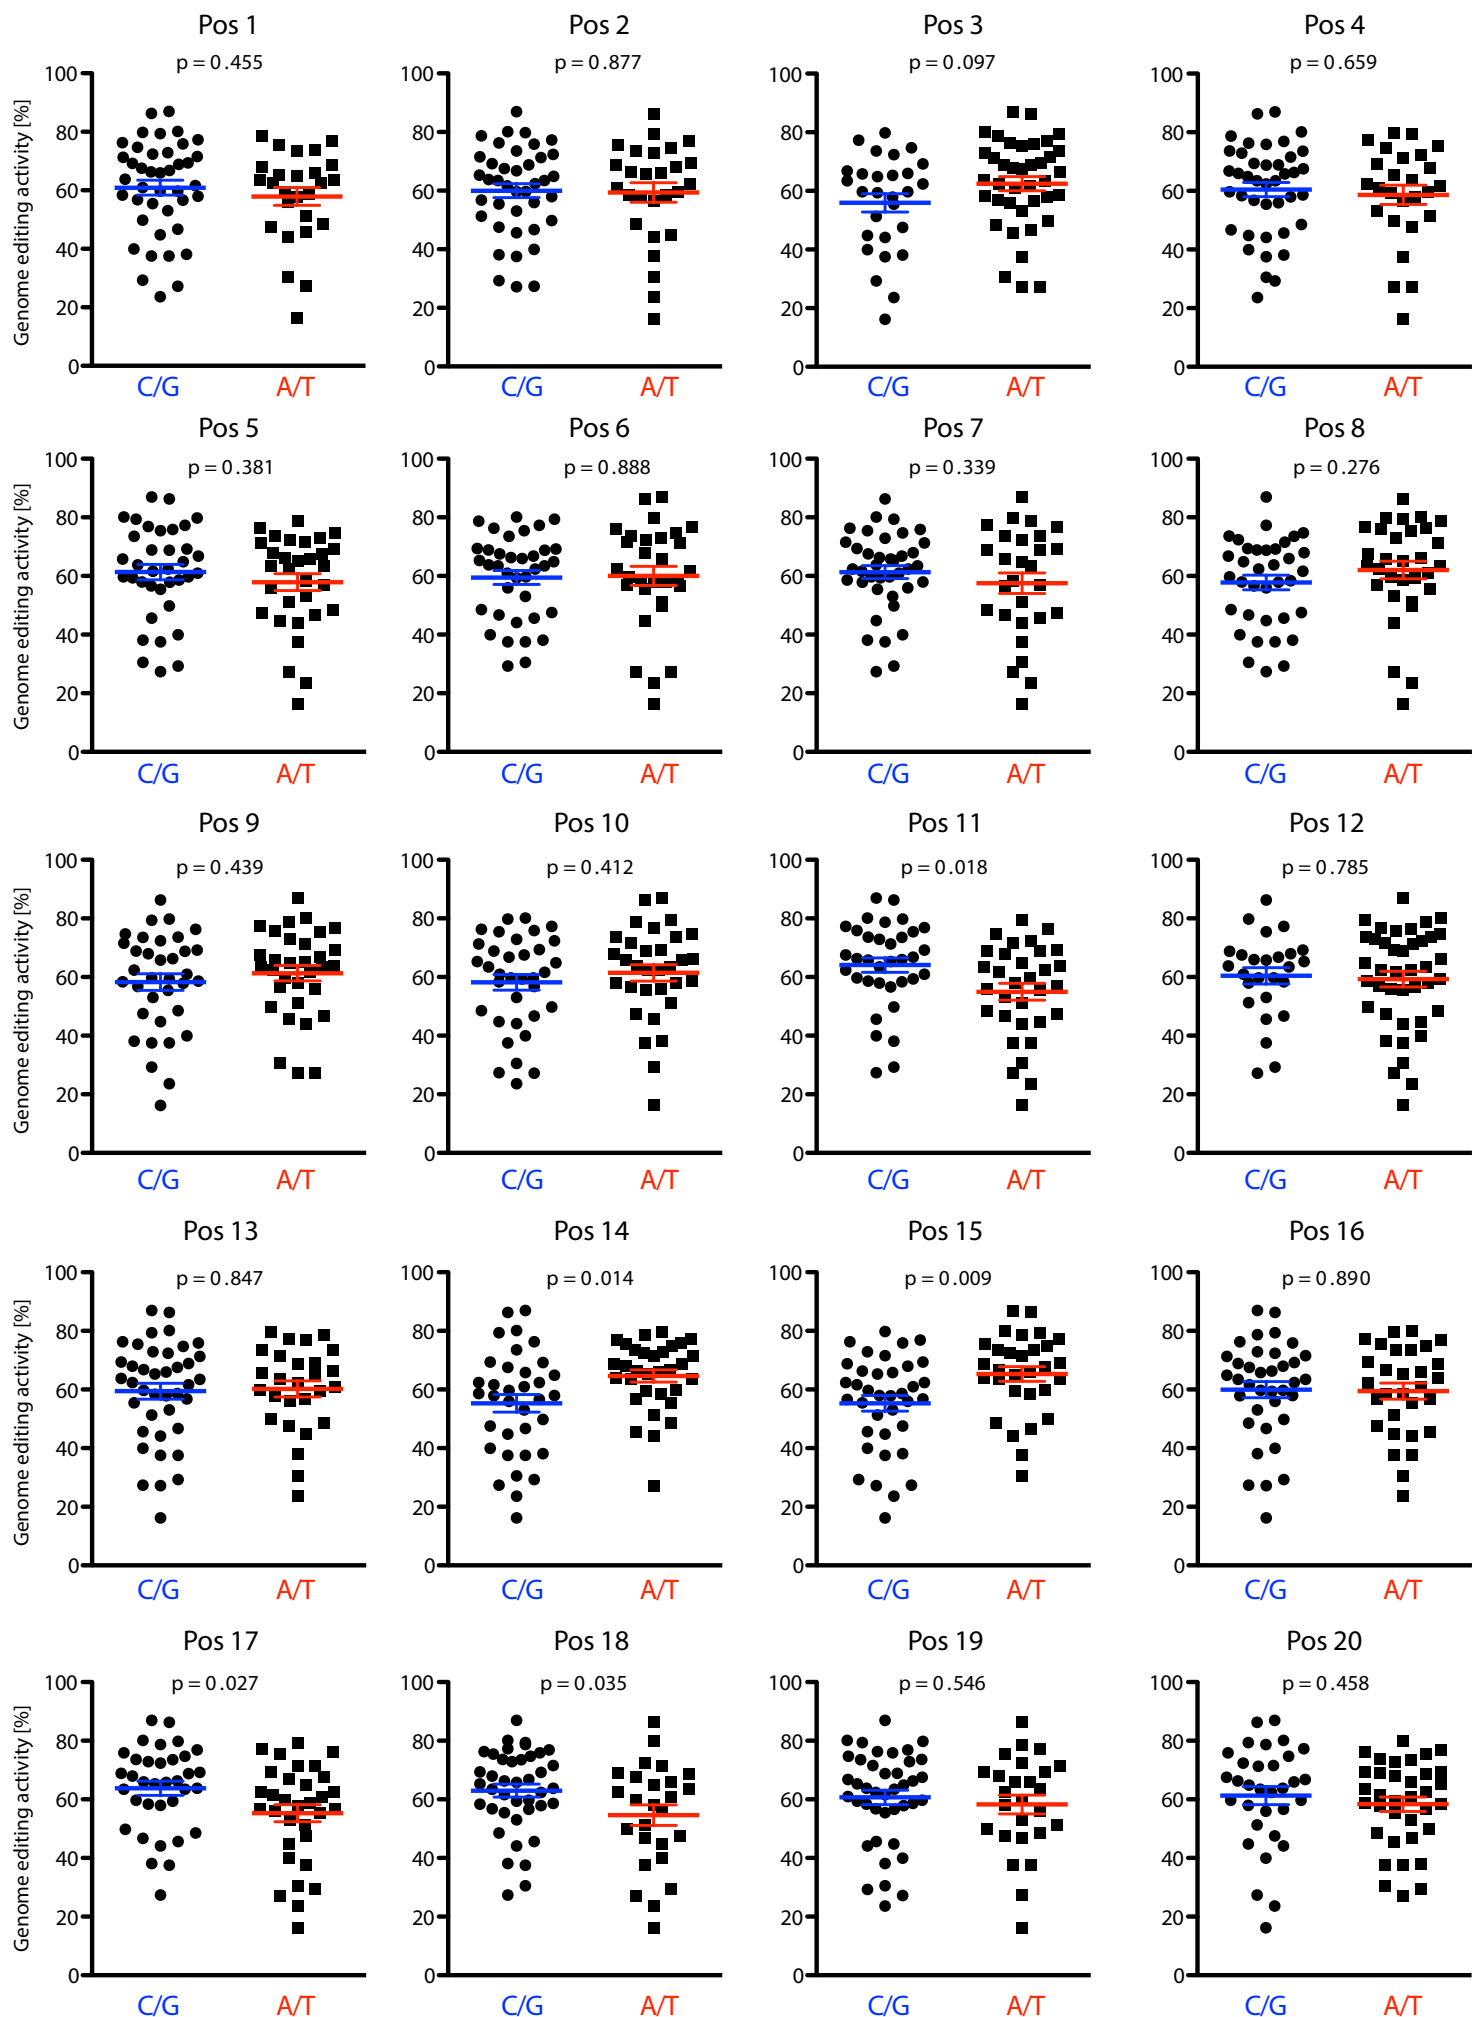

**Supplementary Figure S2 | Base pair composition of the target site.** Shown is the genome editing activity of the 67 sgRNA constructs depicted in Figure 2 as a function of their C/G or A/T content at position 1 to 20 (N of NGG in the PAM is position 21). Mean  $\pm$  SEM is highlighted in colors (G/C blue, A/T red). Statistical analysis was performed using a two-sided, unpaired t-test, whereas nominal p values are depicted.

PAM-adjacent 13-mer sequence

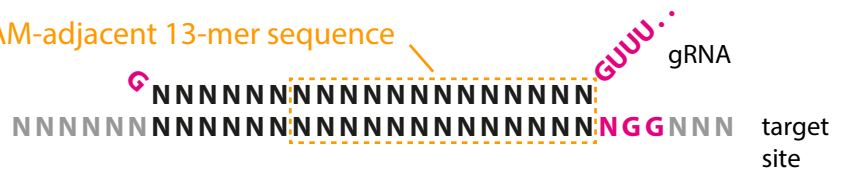

1.) Fetch all annotated mRNAs (NCBI RefSeq).

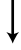

2.) Identify longest open reading frame (ORF)

- If an in-frame ATG is present within the first 80 bases of an ORF: shift ORF boundary to that ATG.
- Select the first half of the ORF for target site identification.

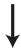

3.) Generate list of suitable spacer/protospacer regions (5'-N<sub>21</sub>GG-3' or 5'-CCN<sub>21</sub>-3')

- must map to genome (UCSC hg19 assembly).

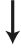

4.) Calculate activity score based on targeting algorithm:

- A or T at position 14 = score +1
- A or T at position 15 = score +1
- G or C at position 18 = score +1
- if GC content in region 2 ... 20 < 35%: set score = 0

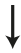

5.) Determine number of target sites of the PAM-adjacent 13-mer sequence within genome.

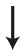

6.) Pick spacer/protospacer region according to the following priorities (list 1 - 4):

activity score = 3 or 2

activity score = 1 or 0

target sites = 1

target sites = 2

target sites = 1

target sites = 2

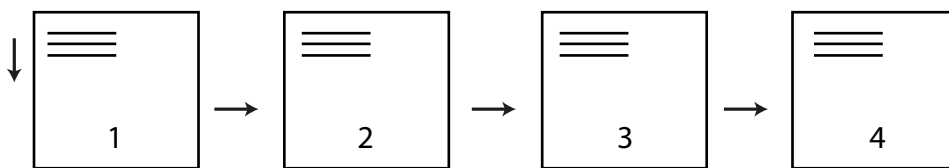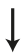

7.) Eliminate duplicate spacer/protospacer regions from total pool.

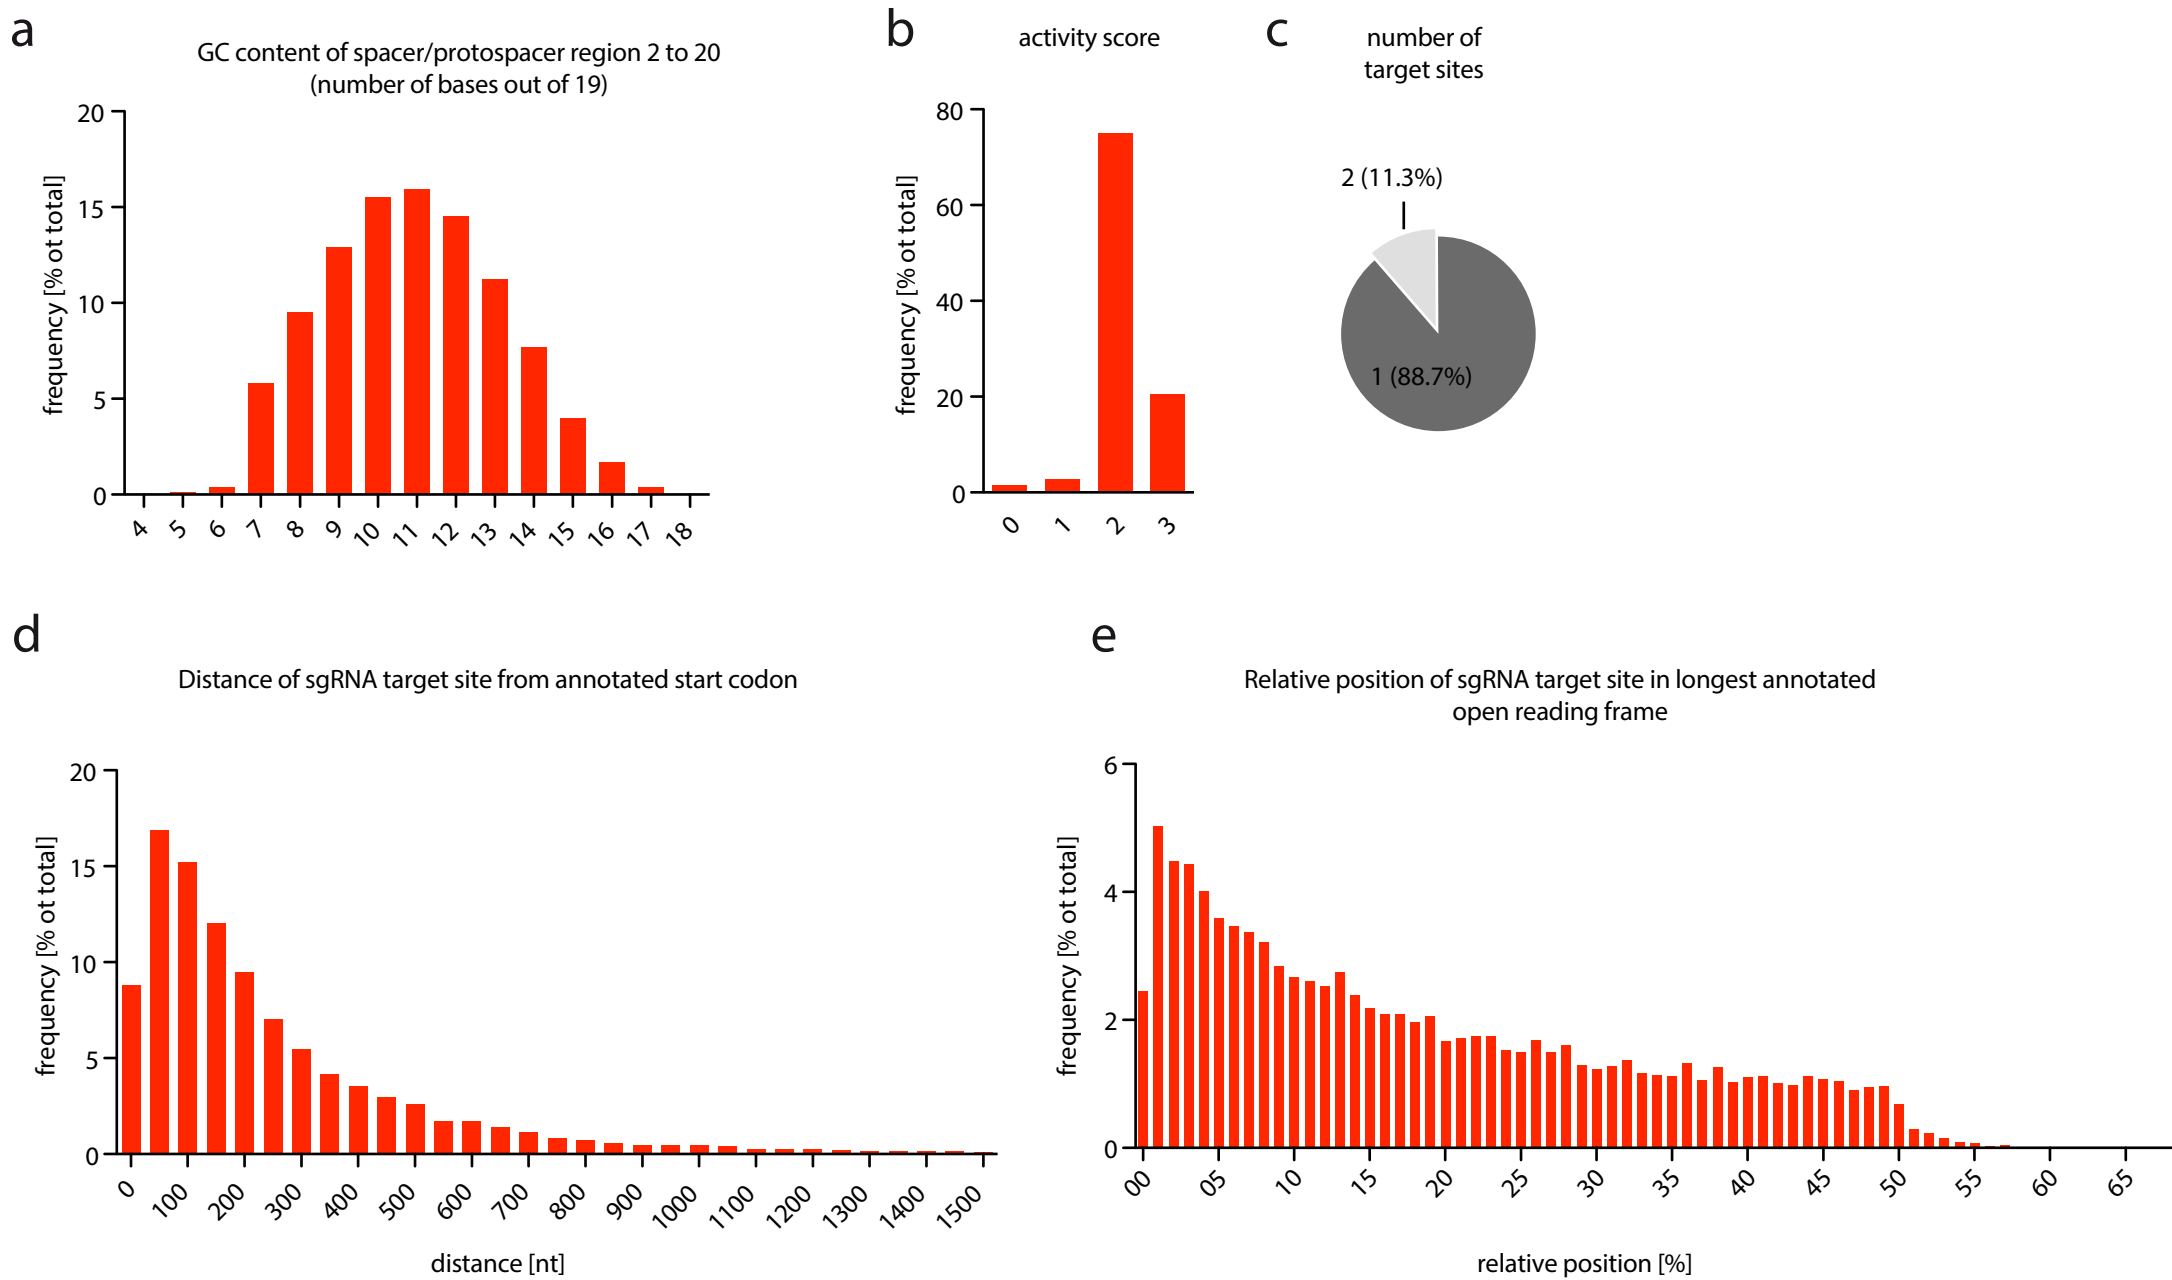

**Supplementary Figure S4 | Design characteristics of the sgRNA<sup>KOLIBRY</sup> library.** Depicted are histograms that show (a) the GC distribution, (b) the activity score according to the library design algorithm and (c) the pie chart shows the proportion of sgRNAs with one or two target sites of the PAM-adjacent 13-mer region. (d and e) Histograms depict the absolute (bin width 50 nt) and relative distance (bin width 1%) of the sgRNA target site from the start codon. Note that target sites beyond 50% of the ORF are obtained due to the fact that an offset of 80 nt from the first start codon is considered for some targets.

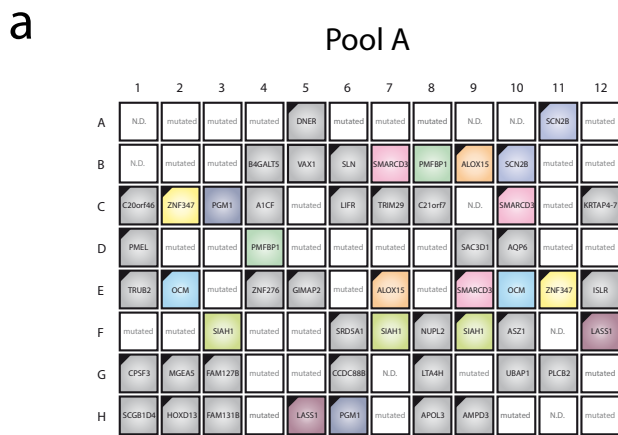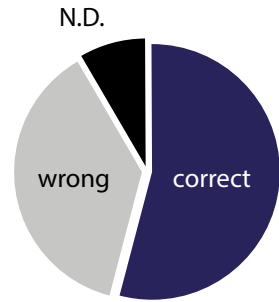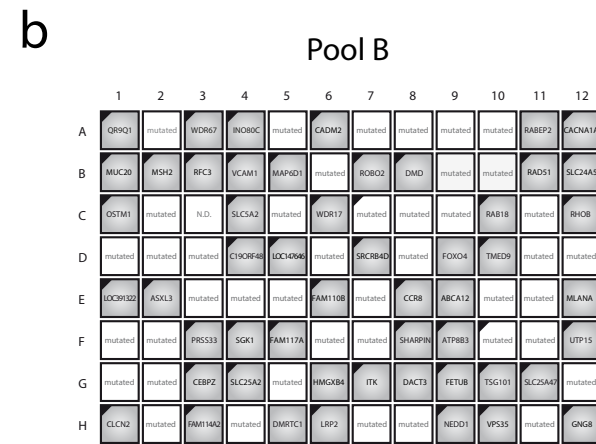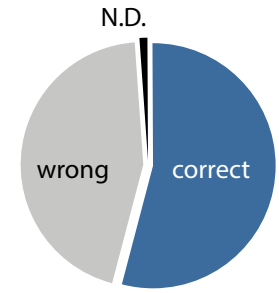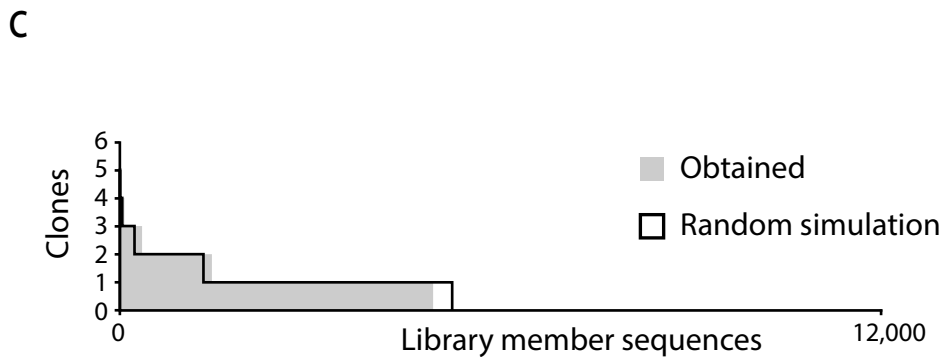

**Supplementary Figure S5 | Elimination of clone duplicates validated by individual sequencing of sgRNAs from two individual pools.** Sequencing results from 96 representative sgRNA library clones picked from pool A (**a**) or pool B (**b**). Indicated are the identifiers of the genes targeted by the retrieved correct sgRNA sequences, mutated sgRNA sequences (mutated), and plasmids that could not be sequenced (N.D.). Colors highlight sgRNA sequences that were observed more than once on the same plate. Black triangles in a well indicate that the respective clone was also identified by orthogonal mixing. Pie chart summarizing the identified sgRNA oligos that are depicted in (**c**). The coverage of individual library members picked from pool B is depicted as compared to a simulation assuming a complete random distribution of library members with no sequence or founder bias.

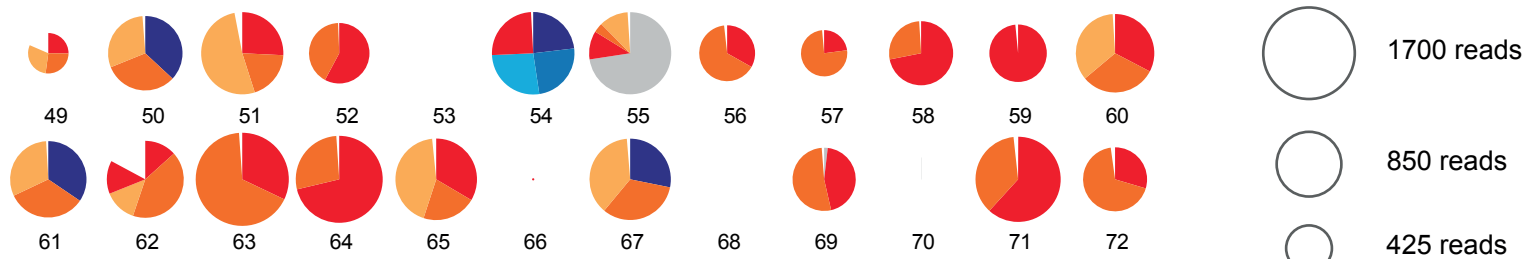

## TRIM13

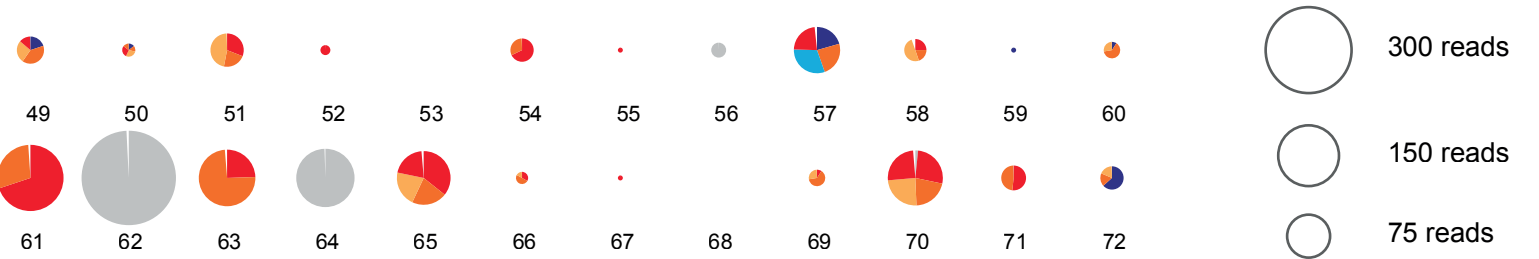

## TRIM25

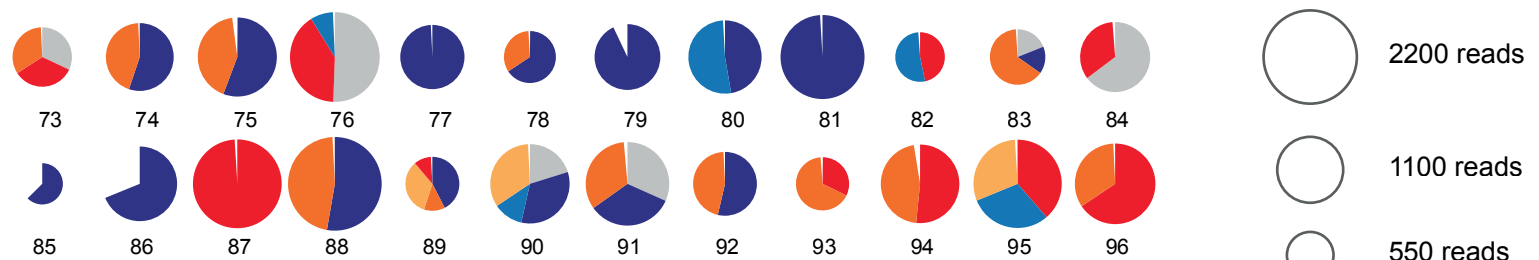

## TRIM68

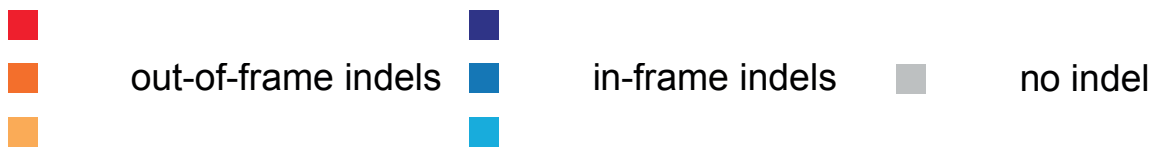

**Supplementary Figure S6 | OutKnocker analysis of 19 individual gene targeting projects.** Depicted is the deep sequencing result of 19 gene targeting projects analyzed by the web tool OutKnocker. For every gene targeting project 24 clones were picked and sequenced. Each pie pieces sums up all reads that have the same mutation and represents the proportion of total reads analyzed. Grey pie charts show reads without indel mutations, blue colors indel mutations that are in frame, whereas red colors indicate indel mutation reads that are out of frame.

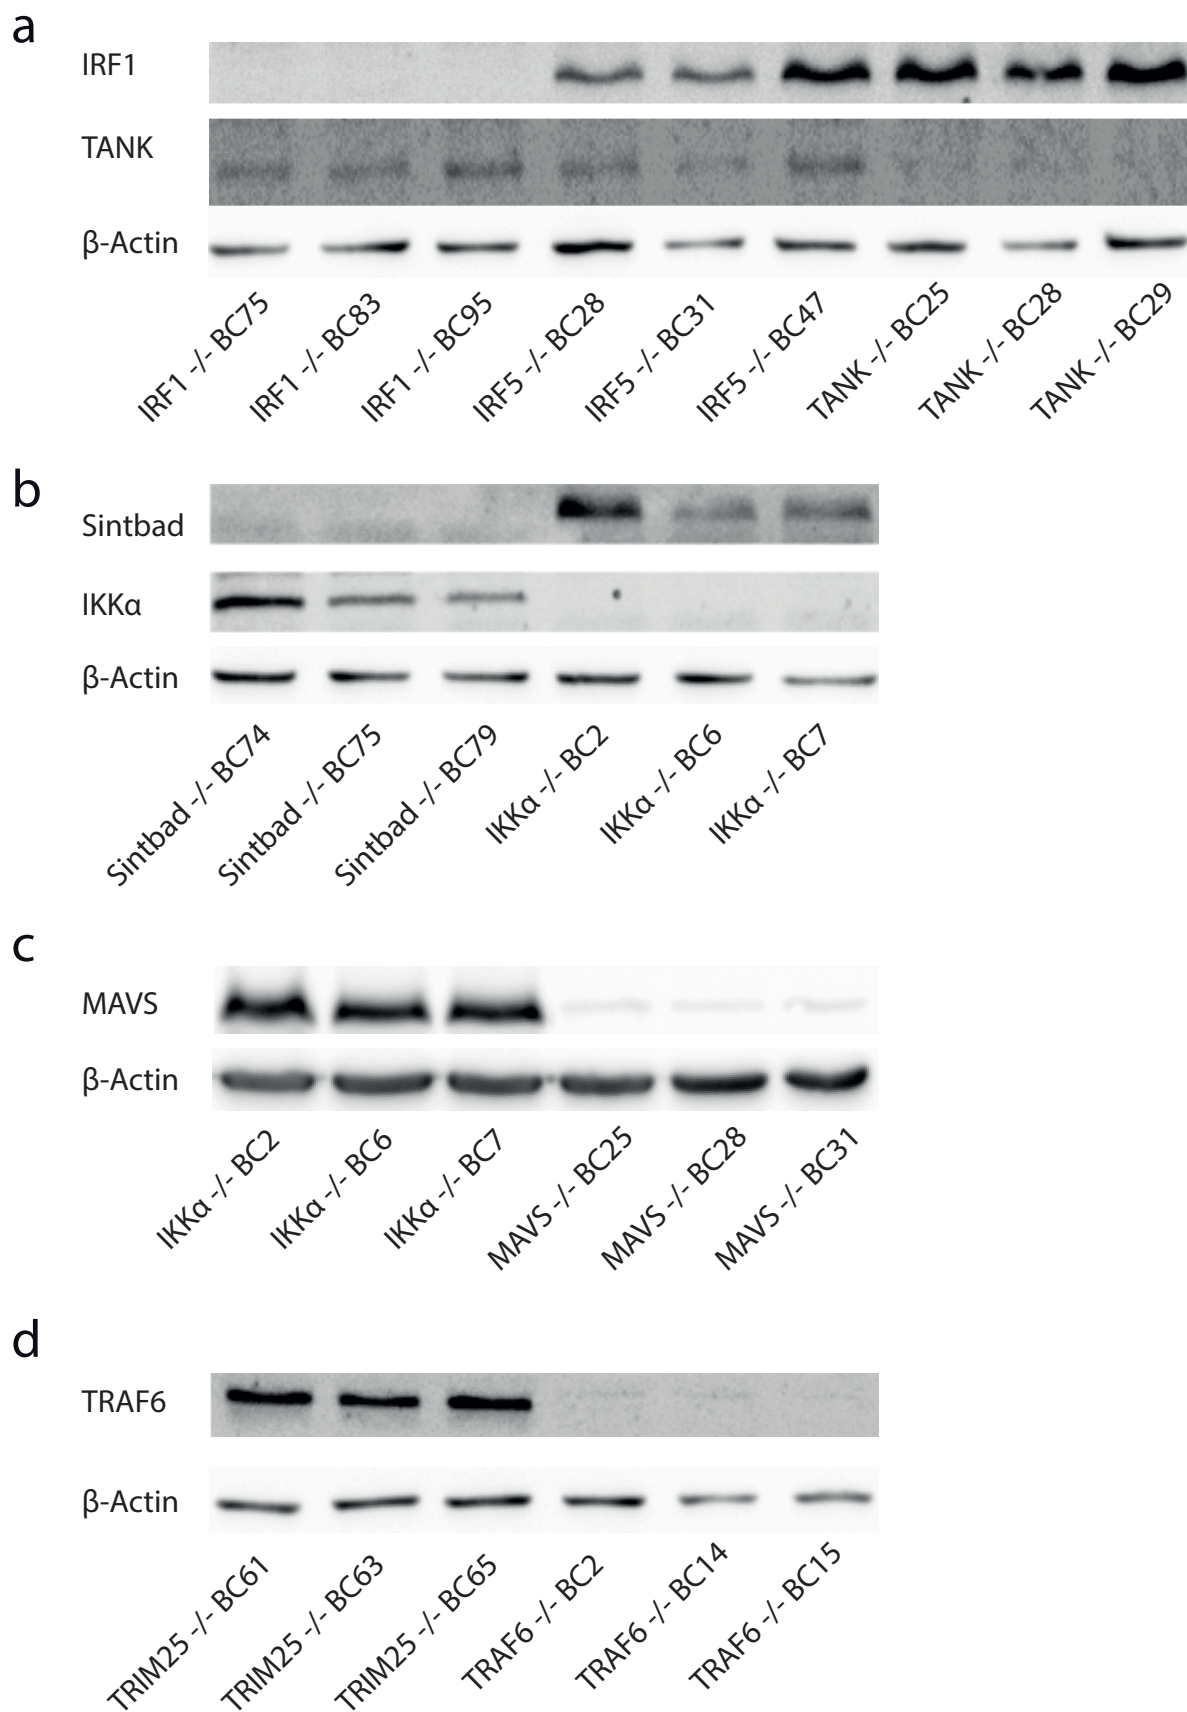

**Supplementary Figure S7 | Expression analysis of six different target genes by immunoblot.** Lysates of knock-out cell clones were probed for  $\beta$ -Actin, (a) IRF1 and TANK, (b) Sintbad and IKK $\alpha$ , (c) MAVS or (d) TRAF6. Knockout cell clones with different genotypes served as wildtype controls. The genotype is indicated on the bottom of the blots, BC indicates the barcode combination that was used for deep sequencing to identify individual clones.



## Correlation between transduction efficiency and genome editing activity

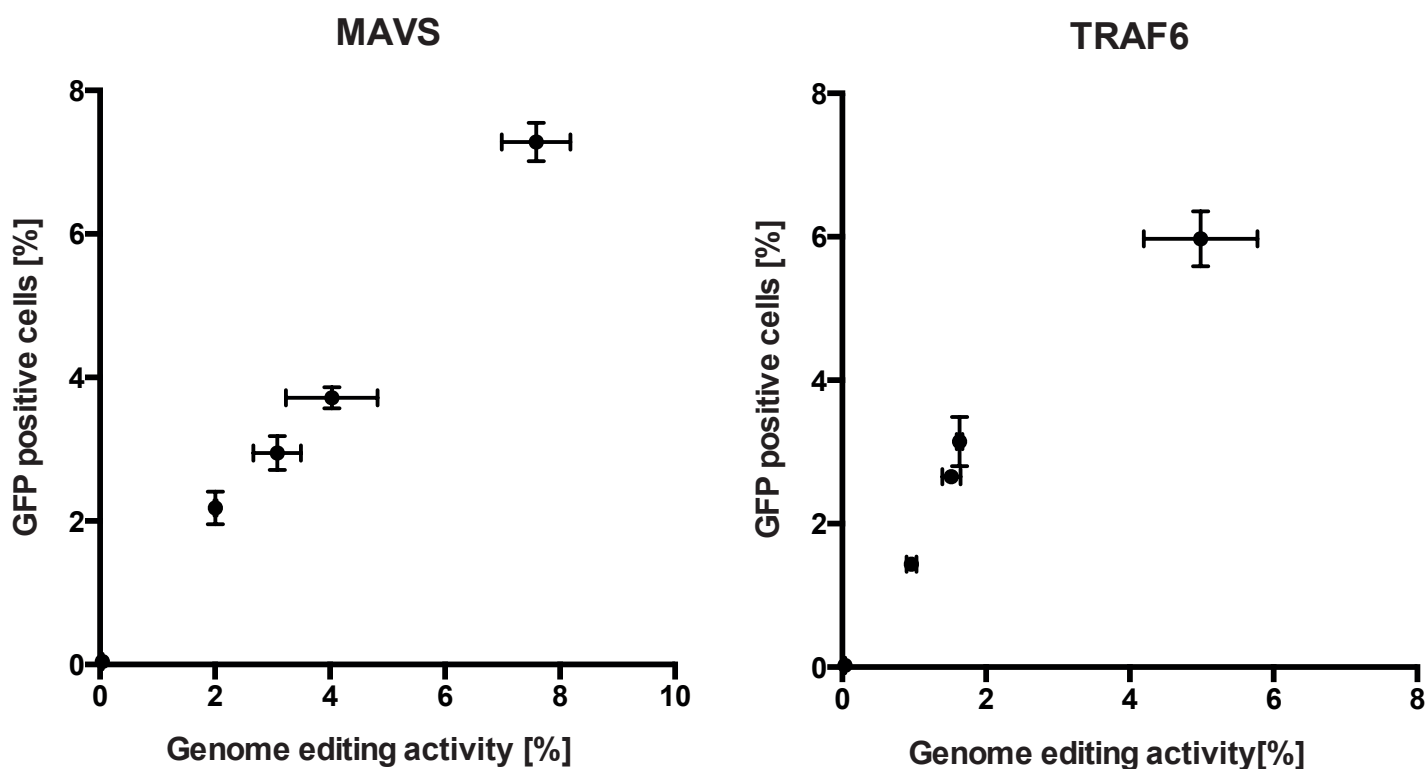

**Supplementary Figure S8 | Correlation between transduction efficiency and genome editing activity.** HEK 293T cells stably expressing Cas9 were transduced with different amounts of lentivirus containing a library plasmid expressing the sgRNA for MAVS and TRAF6. Depicted are plots that show the correlation between the transduction efficiency of the lentiviruses and the genome editing activity in HEK293T cells. Shown are mean values of three independent replicates +/-SEM.

## Supplementary Notes

### Orthogonal mixing and clone calling considerations

The orthogonal mixing strategy we applied allows allocating library member sequences within a large number of library clones while requiring a significantly lower number of PCR reactions and barcoding primer combinations in comparison to the number of clones to be analyzed (Figure 3).

Considering one set of 32 clone plates, an exemplary library sequence found only in position A1 of the respective position-based mixing plate and only in pool I on the group-based mixing plate can be clearly allocated to position A1 on plate 1 of the set. However, when considering a library sequence present twice within a set of 32 clone plates, it depends on the localization of the duplicates if the position of both clones can be unambiguously recovered from the data. For example, if the duplicates are located on a single plate of the set at two different positions, a reliable call is possible. However, considering a library sequence present on plate 1 at position A1 as well as on plate 2 at position A2, the respective sequence would appear twice in the set of the position-based mix plates and twice in the set of the group-based mix plates. As such, it is impossible to conclude from the sequencing data if the sequence is located at (plate 1 A1) and (plate 2 A2) or, alternatively, at (plate 1 A2) and (plate 2 A1). Therefore, any clone calling algorithm must reject calling these positions. Consequently, sequence duplicates do not only reduce the coverage of a library by reducing the total number of individual clones being picked, but also do so by reducing the number of unambiguously allocatable sequences if the duplicates appear within qualifying relative locations among the clone plates.

In the clone library picked from pool A, we observed a high number of clonal duplicates among 96 clones picked from a single transformation reaction streaked on a single agar plate. This is in line with our observation that after 29,568 picks out of a library of 19,956 member sequences at a per-clone fidelity of 54.2%, only 39.4% of library sequences were recovered, while a random clone picking simulation predicts 55.2% of the library to be covered according to the equation:

$$\text{Expected Coverage} = 1 - ((1 - (1/\text{Library Sequences})) ^ (\text{Pick Number} * \text{Fidelity}))$$

A likely explanation for the obvious phenomenon of clonal duplicates within clone sets or on single clone picking plates is that during recovery from transformation before agar plate streaking, bacterial clones might have divided one or two times. Indeed, when we omitted the 1 h recovery step prior to plating the transformed bacteria (pool B), a much lower number of clonal duplicates was observed.

### **The sgRNA<sup>KOLIBRY</sup> target site selection criteria**

After extracting a list of all annotated human mRNA sequences from the current NCBI Reference Sequence Database, every mRNA sequence was scanned for start codons by the sequence *ATG*. At every start codon, the length of a possible open reading frame (ORF) was determined by seeking the first cognate stop codon with the sequence *TGA*, *TAG* or *TAA* shifted downstream by 3 x n bases. Of all ORFs identified in a given mRNA, only the longest ORF was considered for further analyses. To rule out the possibility that an alternative, cognate start codon in the same reading frame renders CRISPR targeting inefficient for disrupting functional gene expression, the first 80 bases of the longest identified ORF were scanned for the presence of secondary in-frame start codons. Upon encounter of such, the

ORF boundary was shifted to that additional, upstream *ATG*. Next, possible CRISPR target sites were identified by searching the sequence 5'-N<sub>21</sub>-GG-3' or 5'-CC-N<sub>21</sub>-3' with the limitation that the target site has to match the human genome (UCSC hg19 assembly). To avoid the possibility of expressing truncated proteins that still retain the full or partial functions of the full-length protein, only target sites located within the first half of the ORF were considered. This measure also increases the likelihood of subjecting the frame-shifted mRNA molecule to nonsense mediated mRNA decay. For all chosen target sites an activity prediction score was calculated based on the base preferences at position 14, 15 (A or T) and 18 (C or G) we observed. We focused on these three positions for their location in the PAM-proximal seed region and as a trade-off between enhancing sgRNA activity and limiting the possible targeting space. Previous studies had identified that point mutations within the PAM-proximal seed region of 6-13bp strongly impact on DNA cleavage activity by the CRISPR:Cas9 complex. Therefore, to limit off-target effects, we favored target sites for which the PAM-proximal 13bp sequence was most unique in the human genome. Considering these criteria, target sites were identified in a hierarchical selection process as depicted in Supplementary Figure 3. The best target site per target gene was then chosen for the genome-wide sgRNA library, whereas the characteristics of these target sites are depicted in Supplementary Figure 4.

## Supplementary Methods

### CRISPR sgRNA assembly

#### Backbone preparation

10  $\mu$ l of the sgRNA entry vector (200 ng/ $\mu$ L in H<sub>2</sub>O) were digested with Apal and SpeI (Fermentas, FastDigest) at 37 °C for 2 h.

#### Vector Digestion Mix:

|            |                              |
|------------|------------------------------|
| 2 $\mu$ l  | 10 x Buffer FastDigest       |
| 10 $\mu$ l | Plasmid Prep 200 ng/ $\mu$ l |
| 1 $\mu$ l  | FastDigest Apal              |
| 1 $\mu$ l  | FastDigest SpeI              |
| 6 $\mu$ l  | H <sub>2</sub> O             |

After 2h, any undigested vector was cleaved by EcoRV (Fermentas, FastDigest) at 37 °C for 1h.

|           |                  |
|-----------|------------------|
| 1 $\mu$ l | FastDigest EcoRV |
|-----------|------------------|

The digestion mix was separated on an agarose gel (1 %), the cleaved product was purified using the innuPrep gel extraction kit (Analytik Jena) and eluted in 15  $\mu$ l H<sub>2</sub>O (typical concentration: 70 ng/ $\mu$ l).

#### Chewback reaction

The digested and purified entry vector was chewed using T4 DNA polymerase (Enzymatics).

#### Chewback Reaction Mix:

|               |                                |
|---------------|--------------------------------|
| 10 $\mu$ l    | 10 x NEB2                      |
| 10 $\mu$ l    | Vector 70 ng/ $\mu$ l          |
| 1 $\mu$ l     | BSA 10 mg/ml                   |
| 1 $\mu$ l     | dTTP 100 mM                    |
| 74.66 $\mu$ l | H <sub>2</sub> O               |
| 3.33 $\mu$ l  | T4 DNA polymerase 3 U/ $\mu$ l |

The reaction was incubated at 27 °C for 5 min, put on ice and subsequently inactivated at 75°C for 20min. Next, the chewed vector was diluted with the short universal reverse strand oligo (5'-PHOS-AACGGACTAGCCTTATTTAACTTGCTATTTCTAGCTCTAAAAC-3', PAGE purified, 100  $\mu$ M, IDT) to a final buffer concentration of 2 x NEB2.

#### Vector Dilution Mix:

|              |                                                  |
|--------------|--------------------------------------------------|
| 20 $\mu$ l   | 10 x NEB2                                        |
| 10 $\mu$ l   | chewed Vector                                    |
| 0.5 $\mu$ l  | short universal reverse strand oligo 100 $\mu$ M |
| 69.5 $\mu$ l | H <sub>2</sub> O                                 |

### Assembly

Gene specific sgRNA oligos (desalted, 100  $\mu$ M, IDT) were diluted 1:400 in H<sub>2</sub>O and next mixed with the Vector dilution and annealed in a PCR cycler (C100, Biorad).

#### Assembly Mix:

|             |                                   |
|-------------|-----------------------------------|
| 2.5 $\mu$ L | Vector Dilution Mix               |
| 2.5 $\mu$ L | sgRNA oligo Dilution 0.25 $\mu$ M |

#### Annealing Program:

| Temp  | Time     | Ramp       |                            |
|-------|----------|------------|----------------------------|
| 75 °C | 2.5 min  | 0.1 °C/sec | 15 cycles; -1 °C per cycle |
| 60 °C | 30 min   | 0.1 °C/sec |                            |
| 60 °C | 2.5 min  | 0.1 °C/sec | 35 cycles; -1 °C per cycle |
| 25 °C | $\infty$ |            |                            |

**Supplementary Table S1 | 96 individual sgRNA oligonucleotides**

| Gene    | Target site + PAM (5' -> 3') | Species | Oligo (5' -> 3')                                                             |
|---------|------------------------------|---------|------------------------------------------------------------------------------|
| AIM2    | GCTTTTGGCAAACGCTTCAGG        | human   | GGAAAGGACGAAACACCGCTTTTGGCAAACGCTTCGTTTTAGAGCTAGAAATAG<br>CAAGTAAAAATAAGG    |
| IFI16   | GGTTTTAAACACCAGCTTGAAGG      | human   | GGAAAGGACGAAACACCGGTTTTAAACACCAGCTTGAAGTTTTAGAGCTAGAAATAG<br>CAAGTAAAAATAAGG |
| IFI16   | TTTTAAATCGTTGCTCAGTAAGG      | human   | GGAAAGGACGAAACACCGTTTTAAATCGTTGCTCAGTAGTTTTAGAGCTAGAAATAG<br>CAAGTAAAAATAAGG |
| IFI16   | TCAGCCAGGTCTCAAGCGTTGG       | human   | GGAAAGGACGAAACACCGCAGCCAGGTCTCAAGCGTTTTAGAGCTAGAAATAG<br>CAAGTAAAAATAAGG     |
| IFI16   | TTCTCTTTCTTGATAGGGCTGG       | human   | GGAAAGGACGAAACACCGTCTCTTTCTTGATAGGGCGTTTTAGAGCTAGAAATAG<br>CAAGTAAAAATAAGG   |
| IFI16   | CAAAGGGAGTAAGGTGTCCGAGG      | human   | GGAAAGGACGAAACACCGAAAGGGAGTAAGGTGTCCGTTTTAGAGCTAGAAATA<br>GCAAGTAAAAATAAGG   |
| PYHIN1  | GCCAGCACGTCCACAGCCATGGG      | human   | GGAAAGGACGAAACACCGCCAGCACGTCCACAGCCATGTTTTAGAGCTAGAAATAG<br>CAAGTAAAAATAAGG  |
| PYHIN1  | TTTTAAATCGTTACTCAGTAAGG      | human   | GGAAAGGACGAAACACCGTTTTAAATCGTTACTCAGTAGTTTTAGAGCTAGAAATAG<br>CAAGTAAAAATAAGG |
| PYHIN1  | TTCTATTAGTTTGCCAAACCGG       | human   | GGAAAGGACGAAACACCGTCTATTAGTTTGCCAAACGTTTTAGAGCTAGAAATAG<br>CAAGTAAAAATAAGG   |
| PYHIN1  | TTAGCTGTGAGACGGTTGCTTGG      | human   | GGAAAGGACGAAACACCGTAGCTGTGAGACGGTTGCTTTTTAGAGCTAGAAATAG<br>CAAGTAAAAATAAGG   |
| PYHIN1  | ACTGGCAGTTGCGTGACGGTTGG      | human   | GGAAAGGACGAAACACCGTGGCAGTTGCGTGACGGTTTTAGAGCTAGAAATA<br>GCAAGTAAAAATAAGG     |
| MNDA    | GGAGTAAACGAAGTGTGGATGG       | human   | GGAAAGGACGAAACACCGGAGTAAACGAAGTGTGGAGTTTTAGAGCTAGAAATA<br>GCAAGTAAAAATAAGG   |
| MNDA    | TTCTATTAGTTGTCTAGACAGG       | human   | GGAAAGGACGAAACACCGTCTATTAGTTGTCTAGACGTTTTAGAGCTAGAAATAG<br>CAAGTAAAAATAAGG   |
| MNDA    | CAAGAGCAGAGTAAGCCCCAGG       | human   | GGAAAGGACGAAACACCGAAGAGCAGAGTAAGCCCCGTTTTAGAGCTAGAAATA<br>GCAAGTAAAAATAAGG   |
| MNDA    | ACTGTCACTGGGTGTTTTGGGG       | human   | GGAAAGGACGAAACACCGTGTCACTGGGTGTTTTGGTTTTAGAGCTAGAAATAG<br>CAAGTAAAAATAAGG    |
| MNDA    | CCACTGTCACTGGGTGTTTTGG       | human   | GGAAAGGACGAAACACCGCACTGTCACTGGGTGTTTTTTTTAGAGCTAGAAATAG<br>CAAGTAAAAATAAGG   |
| TMEM173 | GCGGGCCGACCGCATTGGGAGG       | human   | GGAAAGGACGAAACACCGCGGGCCGACCGCATTGGGGTTTTAGAGCTAGAAATA<br>GCAAGTAAAAATAAGG   |
| TMEM173 | GGCTCACTGCACCCGTAGCAGG       | human   | GGAAAGGACGAAACACCGGCTCACTGCACCCGTAGCGTTTTAGAGCTAGAAATAG<br>CAAGTAAAAATAAGG   |
| TMEM173 | TCCATCCATCCCGTGTCCAGGG       | human   | GGAAAGGACGAAACACCGCCATCCATCCCGTGTCCAGTTTTAGAGCTAGAAATAG<br>CAAGTAAAAATAAGG   |
| TMEM173 | AGAGCACACTCTCCGGTACCTGG      | human   | GGAAAGGACGAAACACCGGAGCACACTCTCCGGTACCGTTTTAGAGCTAGAAATAG<br>CAAGTAAAAATAAGG  |
| TMEM173 | CAACAGGGCCCCACGGCGGAGGG      | human   | GGAAAGGACGAAACACCGAACAGGGCCCCACGGCGGAGTTTTAGAGCTAGAAATA<br>GCAAGTAAAAATAAGG  |
| TMEM173 | TACTCCCTCCAAATGCGGTCGG       | human   | GGAAAGGACGAAACACCGACTCCCTCCAAATGCGGTGTTTTAGAGCTAGAAATAG<br>CAAGTAAAAATAAGG   |
| MB21D1  | GCGGCCCTGGCATTCCGTGCGG       | human   | GGAAAGGACGAAACACCGGCGGCCCTGGCATTCCGTGTTTTAGAGCTAGAAATAG<br>CAAGTAAAAATAAGG   |
| MB21D1  | GGAGACTCGGTGGGATCCATCGG      | human   | GGAAAGGACGAAACACCGGAGACTCGGTGGGATCCATGTTTTAGAGCTAGAAATA<br>GCAAGTAAAAATAAGG  |
| MB21D1  | GAACTTTCCCGCTTAGGCAGGG       | human   | GGAAAGGACGAAACACCGAACTTTCCCGCTTAGGCAGTTTTAGAGCTAGAAATAG<br>CAAGTAAAAATAAGG   |
| MB21D1  | GGCCGCCCTCCGCGCAACTGGG       | human   | GGAAAGGACGAAACACCGGCCCGCCCTCCGCGCAACTTTTTAGAGCTAGAAATAG<br>CAAGTAAAAATAAGG   |
| MB21D1  | GCCCCAGTTGCGCGGACGGGCGG      | human   | GGAAAGGACGAAACACCGCCCCAGTTGCGCGGACGGGGTTTTAGAGCTAGAAATA<br>GCAAGTAAAAATAAGG  |
| MB21D1  | GCGGGCCCCAGTTGCGCGGACGG      | human   | GGAAAGGACGAAACACCGGGCCCCAGTTGCGCGGAGTTTTAGAGCTAGAAATA<br>GCAAGTAAAAATAAGG    |
| IFIT1   | AAATCCCTTCCGCTATAGAATGG      | human   | GGAAAGGACGAAACACCGAATCCCTTCCGCTATAGAAGTTTTAGAGCTAGAAATAG<br>CAAGTAAAAATAAGG  |
| IFIT1   | ACACTCCATTCTATAGCGGAAGG      | human   | GGAAAGGACGAAACACCGCACTCCATTCTATAGCGGAGTTTTAGAGCTAGAAATAG<br>CAAGTAAAAATAAGG  |
| IFIT1   | CATACCCAGCGCTGATTGAGGG       | human   | GGAAAGGACGAAACACCGATACCCAGCGCTGATTGAGTTTTAGAGCTAGAAATAG<br>CAAGTAAAAATAAGG   |
| IFIT1   | ATCTCTGCTATCGCTGGATGG        | human   | GGAAAGGACGAAACACCGTCTCTGCTATCGCTGGAGTTTTAGAGCTAGAAATAG<br>CAAGTAAAAATAAGG    |
| IFIT1   | TTTAAAGCCATCCAGGCGATAGG      | human   | GGAAAGGACGAAACACCGTTAAAGCCATCCAGGCGATTTTTAGAGCTAGAAATAG<br>CAAGTAAAAATAAGG   |

|         |                          |       |                                                                             |
|---------|--------------------------|-------|-----------------------------------------------------------------------------|
| IFIT2   | GGGTGGACACGGTTAAAGTGTTGG | human | GGAAAGGACGAAACACCGGGTGGACACGGTTAAAGTGGTTTTAGAGCTAGAAATA<br>GCAAGTTAAAATAAGG |
| IFIT2   | GGGTCAATGGCGTTCTGAGATGG  | human | GGAAAGGACGAAACACCGGGTCAATGGCGTTCTGAGAGTTTTAGAGCTAGAAATA<br>GCAAGTTAAAATAAGG |
| IFIT2   | AGCCACAATGTGCAACCTACTGG  | human | GGAAAGGACGAAACACCGGCCACAATGTGCAACCTACGTTTTAGAGCTAGAAATAG<br>CAAGTTAAAATAAGG |
| IFIT2   | CAGCTTTACGTAAGCATTCCAGG  | human | GGAAAGGACGAAACACCGAGCTTTACGTAAGCATTCCGTTTTAGAGCTAGAAATAG<br>CAAGTTAAAATAAGG |
| IFIT2   | ACTCTCAATTCTATAGGGACTGG  | human | GGAAAGGACGAAACACCGCTCTCAATTCTATAGGGACGTTTTAGAGCTAGAAATAG<br>CAAGTTAAAATAAGG |
| IFIT2   | AAACCAAAATGAAAGAGCGAAGG  | human | GGAAAGGACGAAACACCGAACCAAAATGAAAGAGCGAGTTTTAGAGCTAGAAATA<br>GCAAGTTAAAATAAGG |
| IFIT3   | GGCAATTGCGATGTACCATCTGG  | human | GGAAAGGACGAAACACCGGCAATTGCGATGTACCATCGTTTTAGAGCTAGAAATAG<br>CAAGTTAAAATAAGG |
| IFIT3   | CAGCTTGCCGTAAGCATTCCAGG  | human | GGAAAGGACGAAACACCGAGCTTGCCGTAAGCATTCCGTTTTAGAGCTAGAAATAG<br>CAAGTTAAAATAAGG |
| IFIT3   | ACCTTGACGTATTGGTTATCAGG  | human | GGAAAGGACGAAACACCGCCTTGACGTATTGGTTATCGTTTTAGAGCTAGAAATAG<br>CAAGTTAAAATAAGG |
| IFIT3   | CCAAGAGAACCTTGACGTATTGG  | human | GGAAAGGACGAAACACCGCAAGAGAACCTTGACGTATGTTTTAGAGCTAGAAATAG<br>CAAGTTAAAATAAGG |
| IFIT5   | CAAAGAAGAAGTACGAAGCCTGG  | human | GGAAAGGACGAAACACCGAAAGAAGAAGTACGAAGCCGTTTTAGAGCTAGAAATA<br>GCAAGTTAAAATAAGG |
| IFIT5   | ACCTTAATATAGCTGTTATCTGG  | human | GGAAAGGACGAAACACCGCCTTAATATAGCTGTTATCGTTTTAGAGCTAGAAATAG<br>CAAGTTAAAATAAGG |
| NLRP3   | GCTAATGATCGACTTCAATGGGG  | human | GGAAAGGACGAAACACCGCTAATGATCGACTTCAATGGTTTTAGAGCTAGAAATAG<br>CAAGTTAAAATAAGG |
| NLRP3   | GATCGCAGCGAAGATCCACACGG  | human | GGAAAGGACGAAACACCGATCGCAGCGAAGATCCACAGTTTTAGAGCTAGAAATA<br>GCAAGTTAAAATAAGG |
| NLRP3   | GTCGTGTAGCGTTTGTTGAGG    | human | GGAAAGGACGAAACACCGTCGTGTAGCGTTTGTTGTTTTAGAGCTAGAAATAG<br>CAAGTTAAAATAAGG    |
| NLRP3   | GATGATGTTGGACTGGGCTCGG   | human | GGAAAGGACGAAACACCGATGATGTTGGACTGGGCGTTTTTAGAGCTAGAAATA<br>GCAAGTTAAAATAAGG  |
| NLRP3   | GCTGGACCATCCTCGGCATGTGG  | human | GGAAAGGACGAAACACCGCTGGACCATCCTCGGCATGTTTTAGAGCTAGAAATAG<br>CAAGTTAAAATAAGG  |
| NLRP3   | GGATCTCCACATGCCGAGGATGG  | human | GGAAAGGACGAAACACCGGATCTCCACATGCCGAGGAGTTTTAGAGCTAGAAATA<br>GCAAGTTAAAATAAGG |
| PYCARD  | GCGCGCGCGGACGCCATCCTGG   | human | GGAAAGGACGAAACACCGCGCGCGGACGCCATCCGTTTTAGAGCTAGAAATA<br>GCAAGTTAAAATAAGG    |
| PYCARD  | GCTGGAGAACCTGACCGCCGAGG  | human | GGAAAGGACGAAACACCGCTGGAGAACCTGACCGCCGTTTTAGAGCTAGAAATA<br>GCAAGTTAAAATAAGG  |
| PYCARD  | GGTGAGGTCCAAGGCTCCATGG   | human | GGAAAGGACGAAACACCGGTGAGGTCCAAGGCTCCAGTTTTAGAGCTAGAAATA<br>GCAAGTTAAAATAAGG  |
| PYCARD  | GCTAACGTGCTGCGGACATGGG   | human | GGAAAGGACGAAACACCGCTAACGTGCTGCGGACATGTTTTAGAGCTAGAAATAG<br>CAAGTTAAAATAAGG  |
| PYCARD  | CGACGCCATCCTGGATGCGCTGG  | human | GGAAAGGACGAAACACCGGACGCCATCCTGGATGCGGTTTTAGAGCTAGAAATA<br>GCAAGTTAAAATAAGG  |
| PYCARD  | TCCTGAGCTCCTCGGCGTCAAG   | human | GGAAAGGACGAAACACCGCTTGAAGCTCCTCGGCGTCTTTTTAGAGCTAGAAATAG<br>CAAGTTAAAATAAGG |
| CASP4   | GCTCATCCGAATATGGAGGCTGG  | human | GGAAAGGACGAAACACCGCTCATCCGAATATGGAGGCTTTTTAGAGCTAGAAATAG<br>CAAGTTAAAATAAGG |
| CASP5   | GGGGCTCACTATGACATCGTGGG  | human | GGAAAGGACGAAACACCGGGGCTCACTATGACATCGTTTTTAGAGCTAGAAATAG<br>CAAGTTAAAATAAGG  |
| CASP5   | TTGATCCGTATTAGGTAAGG     | human | GGAAAGGACGAAACACCGTGATCCGTATTAGGTAAGTTTTAGAGCTAGAAATAG<br>CAAGTTAAAATAAGG   |
| CASP5   | CTCTTTGCGAAAGAATCGCGTGG  | human | GGAAAGGACGAAACACCGTCTTTGCGAAAGAATCGCGTTTTAGAGCTAGAAATAG<br>CAAGTTAAAATAAGG  |
| CASP5   | TGGGGCTCACTATGACATCGTGG  | human | GGAAAGGACGAAACACCGGGGCTCACTATGACATCGTTTTAGAGCTAGAAATA<br>GCAAGTTAAAATAAGG   |
| UNC93B1 | GACCTGCTCGGGTCCCGGACGG   | human | GGAAAGGACGAAACACCGACCTGCTCGGGTCCCGGAGTTTTAGAGCTAGAAATA<br>GCAAGTTAAAATAAGG  |
| UNC93B1 | GCACGTTCTGAGCACGCCAGG    | human | GGAAAGGACGAAACACCGCACGTTCTGAGCACGCCGTTTTAGAGCTAGAAATAG<br>CAAGTTAAAATAAGG   |
| UNC93B1 | GCTCACCTACGGCGTCTACCTGG  | human | GGAAAGGACGAAACACCGCTCACCTACGGCGTCTACCGTTTTAGAGCTAGAAATAG<br>CAAGTTAAAATAAGG |
| GJA1    | ATGGGTGACTGGAGCGCCTTAGG  | human | GGAAAGGACGAAACACCGTGGGTGACTGGAGCGCCTTTTTAGAGCTAGAAATA<br>GCAAGTTAAAATAAGG   |
| GJA1    | TGAGCCAGGTACAAGAGTGTTGGG | human | GGAAAGGACGAAACACCGGAGCCAGGTACAAGAGTGTTTTAGAGCTAGAAATA<br>GCAAGTTAAAATAAGG   |
| GJA1    | ATGGTAAGGTGAAAATGCGAGGG  | human | GGAAAGGACGAAACACCGTGGTAAGGTGAAAATGCGAGTTTTAGAGCTAGAAATA<br>GCAAGTTAAAATAAGG |



|         |                         |        |                                                                               |
|---------|-------------------------|--------|-------------------------------------------------------------------------------|
| GJC1    | GAACACCCAGAAGCGTACATGGG | human  | GGAAAGGACGAAACACCCGAACACCCAGAAGCGTACATGTTTTAGAGCTAGAAATAG<br>CAAGTTAAAATAAGG  |
| GJC1    | GCAAGCCCTATGCAATGCGCTGG | human  | GGAAAGGACGAAACACCCGAAGCCCTATGCAATGCGCGTTTTAGAGCTAGAAATAG<br>CAAGTTAAAATAAGG   |
| GJC1    | CTTCTGACTCGCTGCTAGAGG   | human  | GGAAAGGACGAAACACCCGTTCTGACTCGCTGCTAGGTTTTAGAGCTAGAAATAG<br>CAAGTTAAAATAAGG    |
| CASP1   | TAACGGAGTCAATCAAAGCTCGG | human  | GGAAAGGACGAAACACCCGAACGGAGTCAATCAAAGCTGTTTTAGAGCTAGAAATA<br>GCAAGTTAAAATAAGG  |
| CASP1   | ATTGACTCCGTTATTCCGAAAGG | human  | GGAAAGGACGAAACACCCGTTGACTCCGTTATTCCGAAAGTTTTAGAGCTAGAAATAG<br>CAAGTTAAAATAAGG |
| CASP1   | TGACTCCGTTATTCCGAAAGGGG | human  | GGAAAGGACGAAACACCCGACTCCGTTATTCCGAAAGTTTTAGAGCTAGAAATAG<br>CAAGTTAAAATAAGG    |
| CASP1   | CTGTGCCCTTTTCGGAATAACGG | human  | GGAAAGGACGAAACACCCGTGTGCCCTTTTCGGAATAAGTTTTAGAGCTAGAAATAG<br>CAAGTTAAAATAAGG  |
| AAVS1   | GGGGCCACTAGGGACAGGATTGG | human  | GGAAAGGACGAAACACCCGGGGCCACTAGGGACAGGATGTTTTAGAGCTAGAAATA<br>GCAAGTTAAAATAAGG  |
| PYHIN1  | TTGCCCAAACCGCATCACCTGG  | human  | GGAAAGGACGAAACACCCGTGCCCAAACCGCATCACCTTTTTAGAGCTAGAAATAG<br>CAAGTTAAAATAAGG   |
| CASP5   | GCAAAGAGTCTACCAAGATCAGG | human  | GGAAAGGACGAAACACCCGAAAGAGTCTACCAAGATCGTTTTAGAGCTAGAAATAG<br>CAAGTTAAAATAAGG   |
| IFIT5   | GAAGAAGCTCAGAAGTATACAGG | human  | GGAAAGGACGAAACACCCGAAGAAGCTCAGAAGTATACGTTTTAGAGCTAGAAATA<br>GCAAGTTAAAATAAGG  |
| Mb21d1  | GGCGCCGTCGCTCTTCTACGCGG | mouse  | GGAAAGGACGAAACACCCGCGCGCTGCTCTTCTACGTTTTAGAGCTAGAAATAG<br>CAAGTTAAAATAAGG     |
| Mb21d1  | GCGGACGGCTTCTTAGCGCGTGG | mouse  | GGAAAGGACGAAACACCCGCGGACGGCTTCTTAGCGCGTTTTAGAGCTAGAAATA<br>GCAAGTTAAAATAAGG   |
| Mb21d1  | GTCGGGGCGCGCTTCGCGGACGG | mouse  | GGAAAGGACGAAACACCCGTCGGGGCGCGCTTCGCGGAGTTTTAGAGCTAGAAATA<br>GCAAGTTAAAATAAGG  |
| Mb21d1  | GCAGCTTCCGCGTGGGCCCTGG  | mouse  | GGAAAGGACGAAACACCCGAGCTTCCGCGTGGGCCCTTTTTAGAGCTAGAAATAG<br>CAAGTTAAAATAAGG    |
| Mb21d1  | GCGGGCCGACGTTCCGCGTGG   | mouse  | GGAAAGGACGAAACACCCGCGGGCCGACGTTCCGCGTTTTAGAGCTAGAAATA<br>GCAAGTTAAAATAAGG     |
| Mb21d1  | GAAAGCTGCGGCCGCAAAGGGG  | mouse  | GGAAAGGACGAAACACCCGAAAGCTGCGGCCGCAAAGTTTTAGAGCTAGAAATA<br>GCAAGTTAAAATAAGG    |
| Mb21d1  | GGGGGCTCGATCGCGCGGGCGG  | mouse  | GGAAAGGACGAAACACCCGGGGCTCGATCGCGCGGGTTTTAGAGCTAGAAATA<br>GCAAGTTAAAATAAGG     |
| Mb21d1  | GGTGGCTCCTGCCGCTCCATGG  | mouse  | GGAAAGGACGAAACACCCGGTGCTCCTGCCGCTCCAGTTTTAGAGCTAGAAATAG<br>CAAGTTAAAATAAGG    |
| Mb21d1  | GGCTGGGGCTCCCGTACGGCGGG | mouse  | GGAAAGGACGAAACACCCGGCTGGGGCTCCCGTACGGCGTTTTAGAGCTAGAAATA<br>GCAAGTTAAAATAAGG  |
| gRNA 16 | -                       | Random | GGAAAGGACGAAACACCCGACTGAGAACCCGAAACAGGTTTTAGAGCTAGAAATA<br>GCAAGTTAAAATAAGG   |
| gRNA 26 | -                       | Random | GGAAAGGACGAAACACCCGACTTCGTTTACTCCGAATCGTTTTAGAGCTAGAAATAG<br>CAAGTTAAAATAAGG  |
| gRNA 72 | -                       | Random | GGAAAGGACGAAACACCCGAAAAAGCTCATCCGAATAGTTTTAGAGCTAGAAATAG<br>CAAGTTAAAATAAGG   |
| gRNA 73 | -                       | Random | GGAAAGGACGAAACACCCGAGCGTACTCCATATCCGTTTTAGAGCTAGAAATAG<br>CAAGTTAAAATAAGG     |
| gRNA 78 | -                       | Random | GGAAAGGACGAAACACCCGAAACCTTCTGCAAATCGTTTTAGAGCTAGAAATAG<br>CAAGTTAAAATAAGG     |
| gRNA 81 | -                       | Random | GGAAAGGACGAAACACCCGCCACCGCTCGTCCAGCGTTTTAGAGCTAGAAATAG<br>CAAGTTAAAATAAGG     |
| gRNA 82 | -                       | Random | GGAAAGGACGAAACACCCGCGCCACCAGCTCGTCCAGGTTTTAGAGCTAGAAATAG<br>CAAGTTAAAATAAGG   |
| gRNA 85 | -                       | Random | GGAAAGGACGAAACACCCGAGGCCAGGTAGACGCCGTGTTTTAGAGCTAGAAATA<br>GCAAGTTAAAATAAGG   |

**Supplementary Table S2 | Genome editing activities of 71 CRISPR constructs**

| Gene  | Target site + PAM (5' -> 3') | Background Activity [%] | Activity N1 [%] | Activity N2 [%] | Oligo (5' -> 3')                                                             |
|-------|------------------------------|-------------------------|-----------------|-----------------|------------------------------------------------------------------------------|
| CASP1 | ATTGACTCCGTTATCCGAAAGG       | 0,02                    | 62,65           | 34,41           | GGAAAGGACGAAACACCGTTGACTCCGTTATCCGAAGTTT<br>AGAGCTAGAAATAGCAAGTTAAAATAAGG    |
| CASP1 | CTGTGCCCTTTTCGGAATAACGG      | 0,09                    | 49,16           | 25,96           | GGAAAGGACGAAACACCGTGTGCCCTTTTCGGAATAAGTTT<br>TAGAGCTAGAAATAGCAAGTTAAAATAAGG  |
| CASP1 | TAACGGAGTCAATCAAAGCTCGG      | 0,09                    | 35,61           | 25,49           | GGAAAGGACGAAACACCGAGTCAATCAAAGCTGTTT<br>TAGAGCTAGAAATAGCAAGTTAAAATAAGG       |
| CASP1 | TGACTCCGTTATCCGAAAGGGG       | 0,06                    | 62,71           | 49,15           | GGAAAGGACGAAACACCGGACTCCGTTATCCGAAAGGTTT<br>TAGAGCTAGAAATAGCAAGTTAAAATAAGG   |
| CASP4 | GCTCATCCGAATATGGAGGCTGG      | 0,00                    | 63,17           | 79,84           | GGAAAGGACGAAACACCGCTCATCCGAATATGGAGGCGTTT<br>TAGAGCTAGAAATAGCAAGTTAAAATAAGG  |
| CASP5 | CTCTTTGCGAAAGAATCGCGTGG      | 0,02                    | 76,72           | 72,74           | GGAAAGGACGAAACACCGTCTTTGCGAAAGAATCGCGGTTT<br>TAGAGCTAGAAATAGCAAGTTAAAATAAGG  |
| CASP5 | GGGGCTCACTATGACATCGTGGG      | 0,00                    | 66,19           | 44,68           | GGAAAGGACGAAACACCGGGGCTCACTATGACATCGTGT<br>TAGAGCTAGAAATAGCAAGTTAAAATAAGG    |
| CASP5 | TGGGGCTCACTATGACATCGTGG      | 0,00                    | 85,65           | 44,03           | GGAAAGGACGAAACACCGGGGGCTCACTATGACATCGGTTT<br>TAGAGCTAGAAATAGCAAGTTAAAATAAGG  |
| CASP5 | TTGATCCGTATTAGTACTAGGG       | 0,03                    | 71,06           | 53,64           | GGAAAGGACGAAACACCGTGATCCGTATTAGGTACTAGTTT<br>TAGAGCTAGAAATAGCAAGTTAAAATAAGG  |
| GJA1  | ATGGGTGACTGGAGCGCCTTAGG      | 0,04                    | 68,52           | 63,00           | GGAAAGGACGAAACACCGTGGGTGACTGGAGCGCCTTGTTT<br>TAGAGCTAGAAATAGCAAGTTAAAATAAGG  |
| GJA1  | ATGGTAAGGTGAAAATGCGAGGG      | 0,09                    | 95,69           | 51,64           | GGAAAGGACGAAACACCGTGGTAAGGTGAAAATGCGAGTT<br>TTAGAGCTAGAAATAGCAAGTTAAAATAAGG  |
| GJA1  | TGAGCCAGGTACAAGAGTGTGGG      | 0,01                    | 87,26           | 50,26           | GGAAAGGACGAAACACCGGAGCCAGGTACAAGAGTGTGTT<br>TTAGAGCTAGAAATAGCAAGTTAAAATAAGG  |
| GJC1  | CTTCTGACTCGCTGCTAGAGG        | 0,02                    | 74,96           | 97,63           | GGAAAGGACGAAACACCGTCTTCTGACTCGCTGCTAGGTTT<br>TAGAGCTAGAAATAGCAAGTTAAAATAAGG  |
| GJC1  | GAACACCCAGAAGCGTACATGGG      | 0,01                    | 89,79           | 48,92           | GGAAAGGACGAAACACCGAACCCAGAAGCGTACATGTTT<br>TAGAGCTAGAAATAGCAAGTTAAAATAAGG    |
| GJC1  | GCAAGCCTATGCAATGCGCTGG       | 0,00                    | 71,32           | 56,25           | GGAAAGGACGAAACACCGCAAGCCTATGCAATGCGCGTTT<br>TAGAGCTAGAAATAGCAAGTTAAAATAAGG   |
| IFI16 | CAAAGGGAGTAAGGTGTCCGAGG      | 0,00                    | 84,15           | 74,55           | GGAAAGGACGAAACACCGAAAGGGAGTAAGGTGTCCGGTT<br>TTAGAGCTAGAAATAGCAAGTTAAAATAAGG  |
| IFI16 | GGTTTTAAACACCAGCTTGAAGG      | 0,03                    | 37,19           | 17,15           | GGAAAGGACGAAACACCGTTTTAAACACCAGCTTGAAGTTT<br>TAGAGCTAGAAATAGCAAGTTAAAATAAGG  |
| IFI16 | TCAGCCAGGTCTTCAAGCGTTGG      | 0,05                    | 90,30           | 56,78           | GGAAAGGACGAAACACCGCAGCCAGGTCTTCAAGCGTGT<br>TAGAGCTAGAAATAGCAAGTTAAAATAAGG    |
| IFI16 | TTCTCTTTCTTGATAGGGCTGG       | 0,03                    | 54,95           | 33,23           | GGAAAGGACGAAACACCGTCTCTTTCTTGATAGGGCGTTT<br>AGAGCTAGAAATAGCAAGTTAAAATAAGG    |
| IFI16 | TTTTAAATCGTTGCTCAGTAAGG      | 0,00                    | 0,21            | 0,05            | GGAAAGGACGAAACACCGTTTAAATCGTTGCTCAGTAGTTT<br>AGAGCTAGAAATAGCAAGTTAAAATAAGG   |
| IFIT1 | AAATCCCTCCGCTATAGAATGG       | 0,72                    | 72,20           | 78,79           | GGAAAGGACGAAACACCGAATCCCTCCGCTATAGAAGTTT<br>TAGAGCTAGAAATAGCAAGTTAAAATAAGG   |
| IFIT1 | AACTCCATTCTATAGCGGAAGG       | 0,04                    | 79,08           | 47,76           | GGAAAGGACGAAACACCGCACTCATTCTATAGCGGAGTTT<br>TAGAGCTAGAAATAGCAAGTTAAAATAAGG   |
| IFIT1 | ATCTCTGCCTATCGCCTGGATGG      | 5,88                    | 64,16           | 51,66           | GGAAAGGACGAAACACCGTCTCTGCCTATCGCCTGGAGTTT<br>TAGAGCTAGAAATAGCAAGTTAAAATAAGG  |
| IFIT1 | CATACCAGCGCTGGATTCAAGG       | 0,05                    | 66,76           | 55,20           | GGAAAGGACGAAACACCGATACCCAGCGCTGGATTCAAGTTT<br>TAGAGCTAGAAATAGCAAGTTAAAATAAGG |
| IFIT1 | TTTAAAGCCATCCAGGCGATAGG      | 0,00                    | 80,90           | 54,93           | GGAAAGGACGAAACACCGTTAAAGCCATCCAGGCGATGTTT<br>TAGAGCTAGAAATAGCAAGTTAAAATAAGG  |
| IFIT2 | AAACCAAAATGAAAGAGCGAAGG      | 0,00                    | 74,04           | 79,68           | GGAAAGGACGAAACACCGAACCAAAATGAAAGAGCGAGTT<br>TTAGAGCTAGAAATAGCAAGTTAAAATAAGG  |
| IFIT2 | ACTCTCAATTCTATAGGGACTGG      | 0,13                    | 78,45           | 79,02           | GGAAAGGACGAAACACCGCTCTCAATTCTATAGGGAGCGTTT<br>TAGAGCTAGAAATAGCAAGTTAAAATAAGG |
| IFIT2 | AGCCACAATGTGCAACCTACTGG      | 0,00                    | 69,58           | 57,35           | GGAAAGGACGAAACACCGCCACAATGTGCAACCTACGTTT<br>TAGAGCTAGAAATAGCAAGTTAAAATAAGG   |
| IFIT2 | CAGCTTACGTAAGCATTCCAGG       | 0,00                    | 19,88           | 27,44           | GGAAAGGACGAAACACCGAGCTTACGTAAGCATTCCGTTT<br>TAGAGCTAGAAATAGCAAGTTAAAATAAGG   |
| IFIT2 | GGGTCAATGGCCTTCTGAGATGG      | 0,01                    | 83,22           | 76,34           | GGAAAGGACGAAACACCGGTCAATGGCCTTCTGAGAGTTT<br>TAGAGCTAGAAATAGCAAGTTAAAATAAGG   |
| IFIT2 | GGGTGGACACGGTTAAAGTGTGG      | 0,00                    | 79,44           | 75,16           | GGAAAGGACGAAACACCGGTGGACACGGTTAAAGTGTGTT<br>TTAGAGCTAGAAATAGCAAGTTAAAATAAGG  |
| IFIT3 | ACCTTGACGTATTGGTTATCAGG      | 0,03                    | 37,91           | 57,11           | GGAAAGGACGAAACACCGCTTGACGTATTGGTTATCGTTTT<br>AGAGCTAGAAATAGCAAGTTAAAATAAGG   |
| IFIT3 | CAGCTTGCCGTAAGCATTCCAGG      | 0,01                    | 49,37           | 40,27           | GGAAAGGACGAAACACCGACTTGCCGTAAGCATTCCGTTT<br>TAGAGCTAGAAATAGCAAGTTAAAATAAGG   |

|             |                         |      |       |       |                                                                               |
|-------------|-------------------------|------|-------|-------|-------------------------------------------------------------------------------|
| IFIT3       | CCAAGAGAACCTTGACGTATTGG | 0,00 | 54,24 | 45,26 | GGAAAGGACGAAACACCCGCAAGAGAACCTTGACGTATGTTT<br>TAGAGCTAGAAATAGCAAGTTAAAATAAGG  |
| IFIT3       | GGCAATTGCGATGTACCATCTGG | 0,00 | 87,17 | 57,66 | GGAAAGGACGAAACACCCGCAATTGCGATGTACCATCGTTT<br>TAGAGCTAGAAATAGCAAGTTAAAATAAGG   |
| IFIT5       | ACCTTAATATAGCTGTTATCTGG | 0,04 | 47,21 | 55,43 | GGAAAGGACGAAACACCCGCTTAATATAGCTGTTATCGTTTT<br>AGAGCTAGAAATAGCAAGTTAAAATAAGG   |
| IFIT5       | CAAAGAAGAAGTACGAAGCCTGG | 0,01 | 65,67 | 47,57 | GGAAAGGACGAAACACCCGAAAGAAGAAGTACGAAGCCGTT<br>TTAGAGCTAGAAATAGCAAGTTAAAATAAGG  |
| MB21<br>D1  | GAACCTTCCCGCCTTAGGCAGGG | 0,00 | 72,06 | 44,76 | GGAAAGGACGAAACACCCGAACCTTCCCGCCTTAGGCAGTTT<br>TAGAGCTAGAAATAGCAAGTTAAAATAAGG  |
| MB21<br>D1  | GCGGGCCCCAGTTGCGCGGACGG | 0,07 | 47,72 | 28,55 | GGAAAGGACGAAACACCCGCCAGTTGCGCGGACGGGGTT<br>TTAGAGCTAGAAATAGCAAGTTAAAATAAGG    |
| MB21<br>D1  | GGAGACTCGGTGGGATCCATCGG | 0,00 | 34,89 | 40,15 | GGAAAGGACGAAACACCCGAGACTCGGTGGGATCCATGTT<br>TTAGAGCTAGAAATAGCAAGTTAAAATAAGG   |
| MB21<br>D1  | GGCCGCCCGTCCGCGCAACTGGG | 0,02 | 25,59 | 33,00 | GGAAAGGACGAAACACCCGCCCGCCGTCGCGCAACTGTTT<br>TAGAGCTAGAAATAGCAAGTTAAAATAAGG    |
| MB21<br>D1  | GGCGCCCTGGCATTCCGTGCGG  | 0,04 | 68,47 | 50,99 | GGAAAGGACGAAACACCCGCGCCCTGGCATTCCGTGTTTT<br>TAGAGCTAGAAATAGCAAGTTAAAATAAGG    |
| MNDA        | CAAGAGCAGAGTAAGCCCCAGG  | 0,08 | 69,13 | 63,53 | GGAAAGGACGAAACACCCGAAGAGCAGAGTAAGCCCCGTT<br>TTAGAGCTAGAAATAGCAAGTTAAAATAAGG   |
| MNDA        | CCACTGTCACTGGGTCGTTTTGG | 0,08 | 47,95 | 45,45 | GGAAAGGACGAAACACCCGCACTGTCACTGGGTCGTTTTGTTT<br>TAGAGCTAGAAATAGCAAGTTAAAATAAGG |
| MNDA        | GGAGTAAACGAAGTGTGGATGG  | 0,01 | 56,49 | 57,03 | GGAAAGGACGAAACACCCGAGTAAACGAAGTGTGGAGTT<br>TTAGAGCTAGAAATAGCAAGTTAAAATAAGG    |
| MNDA        | TTCTATTAGTTTGTCTAGACAGG | 0,01 | 6,28  | 1,26  | GGAAAGGACGAAACACCCGTCTATTAGTTTGTCTAGACGTTTT<br>AGAGCTAGAAATAGCAAGTTAAAATAAGG  |
| NLRP3       | GATCGCAGCGAAGATCCACACGG | 0,02 | 74,21 | 63,60 | GGAAAGGACGAAACACCCGATCGCAGCGAAGATCCACAGTTT<br>TAGAGCTAGAAATAGCAAGTTAAAATAAGG  |
| NLRP3       | GATGATGTTGGACTGGGCGTCGG | 0,02 | 85,00 | 60,68 | GGAAAGGACGAAACACCCGATGATGTTGGACTGGGCGTGT<br>TAGAGCTAGAAATAGCAAGTTAAAATAAGG    |
| NLRP3       | GCTAATGATCGACTCAATGGGG  | 0,00 | 76,49 | 66,03 | GGAAAGGACGAAACACCCGTAATGATCGACTCAATGGTTT<br>TAGAGCTAGAAATAGCAAGTTAAAATAAGG    |
| NLRP3       | GCTGGACCATCCTCGGCATGTGG | 0,00 | 57,78 | 58,11 | GGAAAGGACGAAACACCCGTGGACCATCCTCGGCATGGTTT<br>TAGAGCTAGAAATAGCAAGTTAAAATAAGG   |
| NLRP3       | GGATCTCCACATGCCGAGGATGG | 0,01 | 63,58 | 59,67 | GGAAAGGACGAAACACCCGGATCTCCACATGCCGAGGAGTTT<br>TAGAGCTAGAAATAGCAAGTTAAAATAAGG  |
| NLRP3       | GTCGTGTGTAGCGTTTGTGAGG  | 0,10 | 74,03 | 57,88 | GGAAAGGACGAAACACCCGTCGTGTGTAGCGTTTGTGTTT<br>TAGAGCTAGAAATAGCAAGTTAAAATAAGG    |
| PYCAR<br>D  | CGACGCCATCCTGGATGCGCTGG | N.D. | 96,56 | 63,72 | GGAAAGGACGAAACACCCGACGCCATCCTGGATGCGCGTTT<br>TAGAGCTAGAAATAGCAAGTTAAAATAAGG   |
| PYCAR<br>D  | GCGCGCGCGCAGCCATCCTGG   | 0,38 | 39,35 | 40,53 | GGAAAGGACGAAACACCCGCGCGCGCAGCCATCCTGTTT<br>TAGAGCTAGAAATAGCAAGTTAAAATAAGG     |
| PYCAR<br>D  | GCTAACGTGCTGCGCGACATGGG | 0,05 | 49,76 | 56,38 | GGAAAGGACGAAACACCCGTAACGTGCTGCGCGACATGTTT<br>TAGAGCTAGAAATAGCAAGTTAAAATAAGG   |
| PYCAR<br>D  | GCTGGAGAACCTGACCGCCGAGG | 0,15 | 81,02 | 70,75 | GGAAAGGACGAAACACCCGTGGAGAACCTGACCGCCGTTT<br>TTAGAGCTAGAAATAGCAAGTTAAAATAAGG   |
| PYCAR<br>D  | GGTGAGGTCCAAGCGTCCATGG  | 0,01 | 82,00 | 70,51 | GGAAAGGACGAAACACCCGTGAGGTCCAAGCGTCCAGTTT<br>TTAGAGCTAGAAATAGCAAGTTAAAATAAGG   |
| PYCAR<br>D  | TCTTGAGCTCCTCGGCGTCCAGG | 0,03 | 30,79 | 23,91 | GGAAAGGACGAAACACCCGCTTGAAGCTCCTCGGCGTCTGTTT<br>TAGAGCTAGAAATAGCAAGTTAAAATAAGG |
| PYHIN<br>1  | ACTGGCAGTTGCGTGACGGTTGG | 0,02 | 53,79 | 37,39 | GGAAAGGACGAAACACCCGTGGCAGTTGCGTGACGGTGT<br>TAGAGCTAGAAATAGCAAGTTAAAATAAGG     |
| PYHIN<br>1  | GCCAGCAGTCCACAGCCATGGG  | 0,00 | 49,92 | 88,56 | GGAAAGGACGAAACACCCGACGACGTCACAGCCATGTTT<br>TAGAGCTAGAAATAGCAAGTTAAAATAAGG     |
| PYHIN<br>1  | TTAGCTGTGAGACGTTGCTTGG  | 0,03 | 65,31 | 52,00 | GGAAAGGACGAAACACCCGTAGCTGTGAGACGTTGCTGTTT<br>TAGAGCTAGAAATAGCAAGTTAAAATAAGG   |
| PYHIN<br>1  | TTCTATTAGTTGCCCAAACCGG  | 0,06 | 21,58 | 10,91 | GGAAAGGACGAAACACCCGTCTATTAGTTTGCCCAAACGTTT<br>AGAGCTAGAAATAGCAAGTTAAAATAAGG   |
| PYHIN<br>1  | TTTTAAATCGTTACTCAGTAAGG | 0,01 | 0,38  | 0,04  | GGAAAGGACGAAACACCCGTTTAAATCGTTACTCAGTAGTTTT<br>AGAGCTAGAAATAGCAAGTTAAAATAAGG  |
| TMEM<br>173 | AGAGCACACTCTCCGGTACTTGG | 0,00 | 63,20 | 61,59 | GGAAAGGACGAAACACCCGAGCACACTCTCCGGTACCGTTT<br>TAGAGCTAGAAATAGCAAGTTAAAATAAGG   |
| TMEM<br>173 | CAACAGGGCCCCACGGCGGAGGG | 0,05 | 16,55 | 0,37  | GGAAAGGACGAAACACCCGAACAGGGCCCCACGGCGGAGTT<br>TTAGAGCTAGAAATAGCAAGTTAAAATAAGG  |
| TMEM<br>173 | GCGGGCCGACCGCATTGGGAGG  | 0,00 | 74,43 | 59,19 | GGAAAGGACGAAACACCCGGGCGGACCGCATTGGGGTTT<br>TTAGAGCTAGAAATAGCAAGTTAAAATAAGG    |
| TMEM<br>173 | GGCTCACTGCACCCGATAGCAGG | 0,00 | 75,86 | 43,58 | GGAAAGGACGAAACACCCGCTCACTGCACCCGATAGCGTTT<br>TAGAGCTAGAAATAGCAAGTTAAAATAAGG   |
| TMEM<br>173 | TACTCCCTCCAAATGCGGTCCG  | 0,20 | 73,05 | 45,63 | GGAAAGGACGAAACACCCGACTCCCTCCAAATGCGGTGTTT<br>TAGAGCTAGAAATAGCAAGTTAAAATAAGG   |

|             |                        |      |       |       |                                                                            |
|-------------|------------------------|------|-------|-------|----------------------------------------------------------------------------|
| TMEM<br>173 | TCCATCCATCCCGTGCCAGGG  | 0,03 | 79,71 | 50,93 | GGAAAGGACGAAACCCGCCATCCATCCCGTGCCAGTTTT<br>AGAGCTAGAAATAGCAAGTTAAAATAAGG   |
| UNC93<br>B1 | GCACGTTCTTGAGCACGCCAGG | 0,00 | 87,50 | 86,35 | GGAAAGGACGAAACCCGCACGTTCTTGAGCACGCCGTTT<br>TAGAGCTAGAAATAGCAAGTTAAAATAAGG  |
| UNC93<br>B1 | GCTCACCTACGGCGTCTACTGG | 0,00 | 64,09 | 70,99 | GGAAAGGACGAAACCCGCTCACCTACGGCGTCTACCGTTT<br>TAGAGCTAGAAATAGCAAGTTAAAATAAGG |

## Supplementary Table S5 | Genome editing activity of 43 CRISPR constructs from genome wide library

| Gene   | Target site + PAM (5' -> 3') | Background Activity [%] | Activity [%] | Oligo (5' -> 3')                                                             |
|--------|------------------------------|-------------------------|--------------|------------------------------------------------------------------------------|
| AGXT   | GTGGACATCGGGGAGCGCATAGG      | 0,01                    | 64,37        | GGAAAGGACGAAACACCGTGGACATCGGGGAGCGCATGTTTT<br>AGAGCTAGAAATAGCAAGTTAAAATAAGG  |
| AIFM1  | CCGTGTGCGTCCGAAGCCCGAGG      | 0,00                    | 68,03        | GGAAAGGACGAAACACCGCGTGTGCGTCCGAAGCCCGGTTTT<br>AGAGCTAGAAATAGCAAGTTAAAATAAGG  |
| ARG1   | AGGAGCTCCAATAATCCCTATGG      | 0,04                    | 74,63        | GGAAAGGACGAAACACCGGAGCTCCAATAATCCCTAGTTTTA<br>GAGCTAGAAATAGCAAGTTAAAATAAGG   |
| ARG2   | GGATGGAATGCACTCGCGTCTGG      | 0,00                    | 54,29        | GGAAAGGACGAAACACCGGATGGAATGCACTCGCGTCTGTTTT<br>AGAGCTAGAAATAGCAAGTTAAAATAAGG |
| ASL    | GAGCTCATTGGTGAACGGCAGG       | 0,03                    | 55,62        | GGAAAGGACGAAACACCGAGCTCATTGGTGAACGGCGTTTT<br>AGAGCTAGAAATAGCAAGTTAAAATAAGG   |
| ATF3   | GGCAGAAGCACTCACTCCGAGG       | 0,01                    | 72,07        | GGAAAGGACGAAACACCGGAGCAAGCACTCACTCCGGTTTTA<br>GAGCTAGAAATAGCAAGTTAAAATAAGG   |
| CTSB   | GCCTGCAAGCTTCGATGCACGGG      | 0,00                    | 68,17        | GGAAAGGACGAAACACCGCTGCAAGCTTCGATGCACGTTTTA<br>GAGCTAGAAATAGCAAGTTAAAATAAGG   |
| CYBB   | GTAAGACCTCCGGATGGTTTTGG      | 0,00                    | 39,34        | GGAAAGGACGAAACACCGTAAGACCTCCGGATGGTTTTGTTTTA<br>GAGCTAGAAATAGCAAGTTAAAATAAGG |
| DDX58  | GGGTCTCCGGATAATACTCTGG       | 0,05                    | 75,93        | GGAAAGGACGAAACACCGGTCTCCGGATAATACTCGTTTTA<br>GAGCTAGAAATAGCAAGTTAAAATAAGG    |
| DES    | GCTGGCTGGACGAGTAGGCCTGG      | 0,00                    | 85,45        | GGAAAGGACGAAACACCGCTGGCTGGACGAGTAGGCCGTTTT<br>AGAGCTAGAAATAGCAAGTTAAAATAAGG  |
| ERBB2  | GGTGGGTCTCGGACTGGCAGGG       | 0,02                    | 53,67        | GGAAAGGACGAAACACCGTGGGTCTCGGACTGGCAGTTTT<br>AGAGCTAGAAATAGCAAGTTAAAATAAGG    |
| ERBB3  | CAGCATCGCCGGTCACTCAGG        | 0,00                    | 64,86        | GGAAAGGACGAAACACCGAGCATCGCCGGTCACTCGTTTTA<br>GAGCTAGAAATAGCAAGTTAAAATAAGG    |
| GGCX   | GCTGCTGGCCAGCATGACGTAGG      | 0,03                    | 66,73        | GGAAAGGACGAAACACCGCTGCTGGCCAGCATGACGTGTTTT<br>AGAGCTAGAAATAGCAAGTTAAAATAAGG  |
| IFIH1  | GAGGGCTGCCGTTCTCCGGAGG       | 0,03                    | 67,69        | GGAAAGGACGAAACACCGAGGGCTGCCGTTCTCCGGGTTTT<br>AGAGCTAGAAATAGCAAGTTAAAATAAGG   |
| CHUK   | TAGTTTAGTAGTAGAACCCATGG      | 0,02                    | 69,89        | GGAAAGGACGAAACACCGAGTTTAGTAGTAGAACCCAGTTTTA<br>GAGCTAGAAATAGCAAGTTAAAATAAGG  |
| IKBKG  | AATCTGTTGCTCTGCCGGATGG       | 0,01                    | 47,79        | GGAAAGGACGAAACACCGATCTGGTTGCTCTGCCGGAGTTTTA<br>GAGCTAGAAATAGCAAGTTAAAATAAGG  |
| IRAK4  | GATGAACGACCCATTTCTGTTGG      | 0,02                    | 65,24        | GGAAAGGACGAAACACCGATGAACGACCCATTTCTGTGTTTTA<br>GAGCTAGAAATAGCAAGTTAAAATAAGG  |
| IRF1   | GGCCAGCTCCGGAACAAACAGG       | 0,02                    | 54,56        | GGAAAGGACGAAACACCGCCAGCTCCGGAACAAACGTTTT<br>AGAGCTAGAAATAGCAAGTTAAAATAAGG    |
| IRF3   | GGAGGATTTCGGAATCTCCAGG       | 0,00                    | 5,28         | GGAAAGGACGAAACACCGGAGGATTTCCGGAATCTCCGTTTTA<br>GAGCTAGAAATAGCAAGTTAAAATAAGG  |
| IRF5   | GGGCTTCAGCCGACGCGGCGGG       | 0,00                    | 24,17        | GGAAAGGACGAAACACCGGCTTCAGCCGACGCGGCGTTTT<br>AGAGCTAGAAATAGCAAGTTAAAATAAGG    |
| IRF7   | GCAGCCCCACGCGTGTCTCGG        | 0,03                    | 49,20        | GGAAAGGACGAAACACCGCAGCCCCACGCGTGTCTGTTTTA<br>GAGCTAGAAATAGCAAGTTAAAATAAGG    |
| KDR    | GGTAACCAAGTACTTCGCAGGG       | 0,05                    | 67,69        | GGAAAGGACGAAACACCGGTAACCAAGTACTTCGCAGTTTTA<br>GAGCTAGAAATAGCAAGTTAAAATAAGG   |
| MAP3K7 | GTAACACCAACTCATTGCGTGG       | N.D.                    | 65,96        | GGAAAGGACGAAACACCGTAACACCAACTCATTGCGGTTTTA<br>GAGCTAGAAATAGCAAGTTAAAATAAGG   |
| MAVS   | TACTTCATTGCGGCACTGAGGGG      | N.D.                    | 41,12        | GGAAAGGACGAAACACCGACTTCATTGCGGCACTGAGGTTTTA<br>GAGCTAGAAATAGCAAGTTAAAATAAGG  |
| NAP1   | GGCCTATCATGCATATCGAGAGG      | 0,00                    | 63,49        | GGAAAGGACGAAACACCGCCTATCATGCATATCGAGTTTTA<br>GAGCTAGAAATAGCAAGTTAAAATAAGG    |
| NCBP2  | CGTCCCATTTATGTACCGCATGG      | 0,04                    | 40,42        | GGAAAGGACGAAACACCGTCCCATTTATGTACCGCAGTTTTA<br>GAGCTAGAAATAGCAAGTTAAAATAAGG   |
| NCF1   | CCACCTCTCGACTTCTCAAGG        | 0,04                    | 14,80        | GGAAAGGACGAAACACCGCACCTCTCGACTTCTCAGTTTTA<br>GAGCTAGAAATAGCAAGTTAAAATAAGG    |
| OASL   | GGGCTCCTTCGGGAATGGCACGG      | 0,29                    | 45,95        | GGAAAGGACGAAACACCGGCTCCTTCGGGAATGGCAGTTTT<br>AGAGCTAGAAATAGCAAGTTAAAATAAGG   |
| OTC    | GAATGAAAGTCTCACGGACACGG      | N.D.                    | 52,14        | GGAAAGGACGAAACACCGAATGAAAGTCTCACGGACAGTTTT<br>AGAGCTAGAAATAGCAAGTTAAAATAAGG  |
| PSPH   | CCTACAGGAGCGAAATGTTACAGG     | 0,00                    | 40,61        | GGAAAGGACGAAACACCGTACAGGAGCGAAATGTTGTTTT<br>AGAGCTAGAAATAGCAAGTTAAAATAAGG    |
| RIPK1  | GCTCCTGGGCGTCATCATAGAGG      | 7,58                    | 42,83        | GGAAAGGACGAAACACCGCTCCTGGGCGTCATCATAGTTTTA<br>GAGCTAGAAATAGCAAGTTAAAATAAGG   |

|          |                          |      |       |                                                                              |
|----------|--------------------------|------|-------|------------------------------------------------------------------------------|
| SOLH     | GTTGAGGTCGGGCTTGCCGGG    | 0,05 | 48,85 | GGAAAGGACGAAACACCGTTGAGGTCGGGCTTGCCGTTTT<br>AGAGCTAGAAATAGCAAGTTAAAATAAGG    |
| TANK     | CTCTGTGCCTATACAGTGTACGG  | 0,02 | 21,20 | GGAAAGGACGAAACACCGTCTGTGCCTATACAGTGTAGTTTTA<br>GAGCTAGAAATAGCAAGTTAAAATAAGG  |
| TBK1     | TTCAGATTCTGGTAGTCCATAGG  | 0,00 | 82,59 | GGAAAGGACGAAACACCGTCAGATTCTGGTAGTCCATGTTTTA<br>GAGCTAGAAATAGCAAGTTAAAATAAGG  |
| TP53     | GAGCGCTGCTCAGATAGCGATGG  | 0,02 | 64,19 | GGAAAGGACGAAACACCGAGCGTCTCAGATAGCGAGTTTT<br>AGAGCTAGAAATAGCAAGTTAAAATAAGG    |
| TRAF4    | GTGGTGCCCGCATGATGCGGCGG  | 0,02 | 56,04 | GGAAAGGACGAAACACCGTGGTGCCCGCATGATGCGGGTTTT<br>AGAGCTAGAAATAGCAAGTTAAAATAAGG  |
| TRAF5    | CAAACGCATGTGCTCCCGTAAGG  | 0,01 | 46,28 | GGAAAGGACGAAACACCGAAACGCATGTGCTCCCGTAGTTTTA<br>GAGCTAGAAATAGCAAGTTAAAATAAGG  |
| TRAF7    | GCTACAACCGCTTCTCCGGGGGG  | 0,12 | 50,79 | GGAAAGGACGAAACACCGTACAACCGCTTCTCCGGGGTTTTA<br>GAGCTAGAAATAGCAAGTTAAAATAAGG   |
| TRIM13   | GGAGTGTGCGGAATTCCTTGTTG  | 0,01 | 73,04 | GGAAAGGACGAAACACCGGAGTGTGCGGAATTCCTTGTTTT<br>AGAGCTAGAAATAGCAAGTTAAAATAAGG   |
| TRIM25   | GTCGCGCCTGGTAGACGGCGGG   | 0,00 | 1,80  | GGAAAGGACGAAACACCGTCGCGCCTGGTAGACGGCGTTTT<br>AGAGCTAGAAATAGCAAGTTAAAATAAGG   |
| TRIM68   | CCAGCTGCCAATTAGGCCGAGG   | 0,00 | 30,07 | GGAAAGGACGAAACACCGCAGCTGCCAATTAGGCCGCGTTTT<br>AGAGCTAGAAATAGCAAGTTAAAATAAGG  |
| VEZT     | ACCACCTCTTCGTCAAACCTCCGG | 0,05 | 64,71 | GGAAAGGACGAAACACCGCCACCTCTTCGTCAAACCTCGTTTTA<br>GAGCTAGAAATAGCAAGTTAAAATAAGG |
| VKORC1L1 | CTTCTCCGCTCCACGTGGTAGG   | 0,00 | 43,62 | GGAAAGGACGAAACACCGTTCTCCGCTCCACGTGGTGTTTTTA<br>GAGCTAGAAATAGCAAGTTAAAATAAGG  |

## Supplementary Table S6 | Primer sequences

### Primers for amplifying gRNA sequences from orthogonal pools (first PCR):

|             |                                                                |
|-------------|----------------------------------------------------------------|
| grna fwd 1  | ACACTCTTCCCTACACGACGCTCTCCGATCTATTACTCGCTCGGTGCCACTTTTTCAAGTTG |
| grna fwd 2  | ACACTCTTCCCTACACGACGCTCTCCGATCTCCGGAGACTCGGTGCCACTTTTTCAAGTTG  |
| grna fwd 3  | ACACTCTTCCCTACACGACGCTCTCCGATCTCGCTCATTCTCGGTGCCACTTTTTCAAGTTG |
| grna fwd 4  | ACACTCTTCCCTACACGACGCTCTCCGATCTGAGATTCCTCGGTGCCACTTTTTCAAGTTG  |
| grna fwd 5  | ACACTCTTCCCTACACGACGCTCTCCGATCTATTCAGAACTCGGTGCCACTTTTTCAAGTTG |
| grna fwd 6  | ACACTCTTCCCTACACGACGCTCTCCGATCTGAATTCGTCTCGGTGCCACTTTTTCAAGTTG |
| grna fwd 7  | ACACTCTTCCCTACACGACGCTCTCCGATCTCTGAAGCTCTCGGTGCCACTTTTTCAAGTTG |
| grna fwd 8  | ACACTCTTCCCTACACGACGCTCTCCGATCTTAATGCGCTCGGTGCCACTTTTTCAAGTTG  |
| grna fwd 9  | ACACTCTTCCCTACACGACGCTCTCCGATCTCGGCTATGCTCGGTGCCACTTTTTCAAGTTG |
| grna fwd 10 | ACACTCTTCCCTACACGACGCTCTCCGATCTCCGGAACTCGGTGCCACTTTTTCAAGTTG   |
| grna fwd 11 | ACACTCTTCCCTACACGACGCTCTCCGATCTTCTCGGCCTCGGTGCCACTTTTTCAAGTTG  |
| grna fwd 12 | ACACTCTTCCCTACACGACGCTCTCCGATCTAGCGATAGCTCGGTGCCACTTTTTCAAGTTG |
| grna rev    | TGACTGGAGTTCAGACGTGTGCTCTCCGATCTTACGATACAAGGCTGTTAGAGAG        |

### Illumina barcoding primers (second PCR):

|             |                                                              |
|-------------|--------------------------------------------------------------|
| Illu fwd 1  | AATGATACGGCGACCACCGAGATCTACACTATAGCCTACACTCTTCCCTACACGACGCT  |
| Illu fwd 2  | AATGATACGGCGACCACCGAGATCTACACATAGAGGCACACTCTTCCCTACACGACGCT  |
| Illu fwd 3  | AATGATACGGCGACCACCGAGATCTACACCCTATCCTACACTCTTCCCTACACGACGCT  |
| Illu fwd 4  | AATGATACGGCGACCACCGAGATCTACACGGCTCTGAACACTCTTCCCTACACGACGCT  |
| Illu fwd 5  | AATGATACGGCGACCACCGAGATCTACACAGGCGAAGACACTCTTCCCTACACGACGCT  |
| Illu fwd 6  | AATGATACGGCGACCACCGAGATCTACACTAATCTTAACACTCTTCCCTACACGACGCT  |
| Illu fwd 7  | AATGATACGGCGACCACCGAGATCTACACCAGGACGTACACTCTTCCCTACACGACGCT  |
| Illu fwd 8  | AATGATACGGCGACCACCGAGATCTACACGTA CTGACACACTCTTCCCTACACGACGCT |
| Illu fwd 9  | AATGATACGGCGACCACCGAGATCTACACGCGAAGATACACTCTTCCCTACACGACGCT  |
| Illu fwd 10 | AATGATACGGCGACCACCGAGATCTACACCCCTTGTGACTCTTCCCTACACGACGCT    |
| Illu fwd 11 | AATGATACGGCGACCACCGAGATCTACACTCGCATCAACACTCTTCCCTACACGACGCT  |
| Illu fwd 12 | AATGATACGGCGACCACCGAGATCTACACAGAATCAAACACTCTTCCCTACACGACGCT  |
| Illu fwd 13 | AATGATACGGCGACCACCGAGATCTACACGTTTGAGCACA CTCTTCCCTACACGACGCT |
| Illu fwd 14 | AATGATACGGCGACCACCGAGATCTACACGACTAACGACACTCTTCCCTACACGACGCT  |
| Illu fwd 15 | AATGATACGGCGACCACCGAGATCTACACCTCACATAACACTCTTCCCTACACGACGCT  |
| Illu fwd 16 | AATGATACGGCGACCACCGAGATCTACACCCTGAAACACTCTTCCCTACACGACGCT    |

I11u rev 1 CAAGCAGAAGACGGCATAACGAGAT**CGAGTA**ATGTGACTGGAGTTCAGACGTGTGCT  
I11u rev 2 CAAGCAGAAGACGGCATAACGAGAT**CTCCGG**AGTGACTGGAGTTCAGACGTGTGCT  
I11u rev 3 CAAGCAGAAGACGGCATAACGAGAT**AATGAGCGG**TGACTGGAGTTCAGACGTGTGCT  
I11u rev 4 CAAGCAGAAGACGGCATAACGAGAT**GGAATCTC**GTGACTGGAGTTCAGACGTGTGCT  
I11u rev 5 CAAGCAGAAGACGGCATAACGAGAT**TTCTGA**ATGTGACTGGAGTTCAGACGTGTGCT  
I11u rev 6 CAAGCAGAAGACGGCATAACGAGAT**ACGAATTC**GTGACTGGAGTTCAGACGTGTGCT  
I11u rev 7 CAAGCAGAAGACGGCATAACGAGAT**AGCTTCAGG**TGACTGGAGTTCAGACGTGTGCT  
I11u rev 8 CAAGCAGAAGACGGCATAACGAGAT**GCGCATTAG**TGACTGGAGTTCAGACGTGTGCT  
I11u rev 9 CAAGCAGAAGACGGCATAACGAGAT**CATAGCCGG**TGACTGGAGTTCAGACGTGTGCT  
I11u rev 10 CAAGCAGAAGACGGCATAACGAGAT**TTTCGGG**AGTGACTGGAGTTCAGACGTGTGCT  
I11u rev 11 CAAGCAGAAGACGGCATAACGAGAT**GCGCGAG**AGTGACTGGAGTTCAGACGTGTGCT  
I11u rev 12 CAAGCAGAAGACGGCATAACGAGAT**CTATCGCT**GTGACTGGAGTTCAGACGTGTGCT  
I11u rev 13 CAAGCAGAAGACGGCATAACGAGAT**TGTAGTGCG**TGACTGGAGTTCAGACGTGTGCT  
I11u rev 14 CAAGCAGAAGACGGCATAACGAGAT**GCGTCGAC**GTGACTGGAGTTCAGACGTGTGCT  
I11u rev 15 CAAGCAGAAGACGGCATAACGAGAT**GGTCTTCT**GTGACTGGAGTTCAGACGTGTGCT  
I11u rev 16 CAAGCAGAAGACGGCATAACGAGAT**AAATGTCCG**TGACTGGAGTTCAGACGTGTGCT  
I11u rev 17 CAAGCAGAAGACGGCATAACGAGAT**GTTGAAAC**GTGACTGGAGTTCAGACGTGTGCT  
I11u rev 18 CAAGCAGAAGACGGCATAACGAGAT**CTTTACGG**TGACTGGAGTTCAGACGTGTGCT  
I11u rev 19 CAAGCAGAAGACGGCATAACGAGAT**ATGCCTGGG**TGACTGGAGTTCAGACGTGTGCT  
I11u rev 20 CAAGCAGAAGACGGCATAACGAGAT**CAATAAGG**GTGACTGGAGTTCAGACGTGTGCT  
I11u rev 21 CAAGCAGAAGACGGCATAACGAGAT**CGCCGTAAG**TGACTGGAGTTCAGACGTGTGCT  
I11u rev 22 CAAGCAGAAGACGGCATAACGAGAT**TAAAGCTT**GTGACTGGAGTTCAGACGTGTGCT  
I11u rev 23 CAAGCAGAAGACGGCATAACGAGAT**TTGCTGCCG**TGACTGGAGTTCAGACGTGTGCT  
I11u rev 24 CAAGCAGAAGACGGCATAACGAGAT**CTCAATGT**GTGACTGGAGTTCAGACGTGTGCT



## Supplementary Table S7 | Vector sequences

### pR-U6-gRNA

CTGCAGCCTGAATATGGGCCAAACAGGATATCTGTGGTAAGCAGTTCCTGCCCCGGCTCAGGGCCAAGAACAGAT  
GGAACAGCTGAATATGGGCCAAACAGGATATCTGTGGTAAGCAGTTCCTGCCCCGGCTCAGGGCCAAGAACAGAT  
GGTCCCCAGATGCGGTCCAGCCCTCAGCAGTTTCTAGAGAACCATCAGATGTTTCCAGGGTGGCCCAAGGACCTG  
AAATGACCCTGTGCCTTATTTGAACTAACCAATCAGTTCGCTTCTCGCTTCTGTTTCGCGCGCTTCTGCTCCCCGA  
GCTCAATAAAAAGAGCCCAACCCCTCACTCGGGGCGCCAGTCTCCGATTGACTGAGTCGCCCCGGTACCCGCTG  
TATCCAATAAACCCCTCTTGCAGTTGCATCCGACTTGTGGTCTCGCTGTTCTTGGGAGGGTCTCCTCTGAGTGAT  
TGACTACCCGTGACGCGGGGTCTTTCATTTGGGGCTCGTCCGGATCGGGAGACCCCTGCCAGGGACCACCGA  
CCCACCACCGGGAGGTAAGCTGGCCAGCAACTTATCTGTGTCTGTCCGATTGTCTAGTGTCTATGACTGATTTTA  
TGCGCCTGCGTCGGTACTAGCTAGTTAGCTAACTAGCTCTGTATCTGGCGGACCCGTGGTGGAACTGACGAGTTC  
TGAACACCCGGCCGCAACCCTGGGAGACGTCCAGGGACTTTGGGGGCCGTTTTTGTGGCCGACCTGAGGAAGG  
GAGTCGATGTGGAATCCGACCCCGTCAAGGATATGTGGTTCTGGTAGGAGACGAGAACCTAAAACAGTTCGCCCT  
CCGTCTGAATTTTTGCTTTTCGGTTTGAACCGAAGCCGCGCTTGTCTGCTGCAGCATCGTTCTGTGTTGTCT  
CTGTCTGACTGTGTTTCTGTATTTGTCTGAAAATTAGGGCCAGACTGTTACCACTCCCTTAAGTTTGACCTTAGA  
TCACTGGAAAGATGTGAGCGGCTCGCTCACAACCAGTCGGTAGATGTCAAGAAGAGACGTTGGGTACCTTCTG  
CTCTGCAGAATGGCCAACCTTTAACGTCGGATGGCCGCGAGACGGCACCTTTAACCAGACCTCATCACCAGGT  
TAAGATCAAGGTCTTTTACCTGGCCCGCATGGACACCCAGACCAGTCCCTACATCGTGACCTGGGAAGCCTT  
GGCTTTTGACCCCTCCCTGGGTCAAGCCCTTGTACACCCTAAGCCTCCGCTCCTCTTCTTCCATCCGCGCC  
GTCTCTCCCCCTTGAACCTCCTCTTTCGACCCCGCTCAATCCTCCCTTATCCAGCCCTCACTCCTTCTTAGG  
CGCCGGCCGGATCCGAGGGCCTATTTCCCATGATTCTTTCATATTTGCATATACGATAACAAGGCTGTTAGAGAGA  
TAATTGGAATTAATTTGACTGTAACACAAAGATATTAGTACAAAATACGTGACGTAGAAAGTAATAATTTCTTG  
GGTAGTTTGCAGTTTTAAAATTATGTTTTAAAATGGACTATCATATGCTTACCCTAACCTGAAAGTATTTTCGATT  
TCTTGGCTTTATATATCTTGTGAAAGGACGAAACACCCGGCCCTCGATATCGACTAGTCCGTTATCAACTTGAA  
AAAGTGGCACCGAGTCGGTGTCTTTTTTTCGAATTCGCCAGCACAGTGGTCGACCCTGTGGAATGTGTGTCAGTTA  
GGGTGTGAAAGTCCCCAGGCTCCCCAGCAGGCAGAAGTATGCAAAGCATGCATCTCAATTAGTCAGCAACCAGG  
TGTGAAAGTCCCCAGGCTCCCCAGCAGGCAGAAGTATGCAAAGCATGCATCTCAATTAGTCAGCAACCATAGTC  
CCGCCCTAACTCCGCCATCCCGCCCTAACTCCGCCAGTTCGCCCATCTCCGCCCATGGCTGACTAATT  
TTTTTTATTTATGCAGAGGCCGAGGCCGCTCGGCCCTGAGCTATTCAGAAGTAGTGAGGAGGCTTTTTTGGG  
GGCCTAGGCTTTTGCAAAAGCTTACCATGACCGAGTACAAGCCACGGTGGCCTCGCCACCCGACGACGACCTG  
CCCAGGGCCGTACGCACCCCTCGCCGCGCGTTCGCCGACTACCCGCCACGCGCCACACCGTCGATCCGGACCCG  
CACATCGAGCGGTCCAGGCTGCAAGAAGCTTCTCCTCAGCGCGTCCGGCTCGACATCGGCAAGGTGTGGGTG  
GCGGACGACGGCGCGCGGTGGCGGTCTGGACCAGCCCGAGAGCGTTCGAAGCGGGGGCGGTGTTCCGCCGAGATC  
GGCCCGCATGGCCGAGTTGAGCGGTTCCCGCTGGCCGCGCAGCAACAGATGGAAGGCCTCCTGGCGCCGAC  
CGGCCAAGGAGCCCGGTGGTTTCTGGCCACCGTCCGGCTCTCGCCGACCAACCAGGGCAAGGGTCTGGGCAGC  
GCCGTGCTGCTCCCCGAGTGGAGGCGGCCGAGCGCGCGGGGTGCCCGCTTCTGGAGACCTCCGCGCCCCG  
AACCTCCCCTTCTACGAGCGGCTCGGCTTACCGTCACCGCCGACGTCGAGTGCCCGAAGGACCGCGGACCTGG  
TGCATGACCCGCAAGCCCGGTGCTGACGCCCCGCCACGACCCGACGCGCCGACCGAAAGGAGCGCACGACCC  
CATGCATCGATAAAAATAAAGATTTTTATTTAGTCTCCAGAAAAAGGGGGAATGAAAGACCCACCTGTAGTTTT  
GGCAAGCTAGCTTAAGTAACGCCATTTTGAAGGCATGGAAAAATACATAACTGAGAATAGAGAAGTTCAGATCA  
AGGTGAGGAACAGATGGAACAGCTGAATATGGGCCAAACAGGATATCTGTGGTAAGCAGTTCCTGCCCCGGCTCA  
GGGCCAAGAACAGATGGAACAGCTGAATATGGGCCAAACAGGATATCTGTGGTAAGCAGTTCCTGCCCCGGCTCA  
GGGCCAAGAACAGATGGTCCCCAGATGCGGTCCAGCCCTCAGCAGTTTCTAGAGAACCATCAGATGTTTCCAGGG  
TGCCCAAGGACCTGAAATGACCCTGTGCCTTATTTGAACTAACCAATCAGTTCGCTTCTCGCTTCTGTTTCGCGC  
GCTTCTGCTCCCCGAGCTCAATAAAAAGAGCCCAACCCCTCACTCGGGGCGCCAGTCTCCGATTGACTGAGTC  
GCCCGGTACCCGTGTATCCAATAAACCCCTCTTGCAGTTGCATCCGACTTGTGGTCTCGCTGTTCTTGGGAGGG  
TCTCCTCTGAGTGATTGACTACCCGTGACGCGGGGTCTTTCATTTCCGACTTGTGGTCTCGCTGCCTTGGGAGGG  
TCTCCTCTGAGTGATTGACTACCCGTGACGCGGGGTCTTTCACATGCAGCATGTATCAAAATTAATTTGGTTTTTT  
TTCTTAAGTATTTACATTAATGGCCATAGTTGCATTAATGAATCGGCCAACGCGCGGGGAGAGGCGTTTTGCGT  
ATTGGCGCTCTTCCGCTTCTCGCTCACTGACTCGCTGCGCTCGGTGTTCCGGTGGCGGAGCGGTATCAGCTC  
ACTCAAAGGCGGTAATACGGTTATCCACAGAATCAGGGGATAACGCAGGAAAGAACATGTGAGCAAAGGCCAGC  
AAAAGGCCAGGAACCGTAAAAAGGCCGCTTGTGGCGTTTTTCCATAGGCTCCGCCCCCTGACGAGCATCACA  
AAAATCGACGCTCAAGTCAGAGGTGGCGAAACCCGACAGGACTATAAAGATACCAGGCGTTTTCCCTTGGAAAGCT  
CCCTCGTGGCTCTCCTGTTCCGACCCTGCCGCTTACCGGATACCTGTCCGCTTTCTCCCTTCCGGAAGCGTGG  
CGTTTTCTCATAGCTCAGCTGTAGGTATCTCAGTTCGGTGTAGGTGTTCCGCTCCAAGCTGGGCTGTGTGCAG  
AACCCCCGTTTCCAGCCGACCGCTGCGCCTTATCCGGTAACCTATCGTCTTGAAGTCCAACCCGGTAAGACACGACT  
TATCGCCACTGGCAGCAGCCACTGGTAACAGGATTAGCAGAGCGAGGTATGTAGGCGGTGCTACAGAGTCTTGA  
AGTGGTGGCCTAACTACGGCTACACTAGAAGGACAGTATTTGGTATCTGGCTCTGCTGAAGCCAGTTACCTTCG

GAAAAAGAGTTGGTAGCTCTTGATCCGGCAAACAAACCACCGCTGGTAGCGGTGGTTTTTTTTGTTTGCAAGCAGC  
AGATTACGCGCAGAAAAAAGGATCTCAAGAAGATCCTTTGATCTTTTCTACGGGGTCTGACGCTCAGTGAACG  
AAAACACGTTAAGGGATTTTTGGTCATGAGATTATCAAAAAGGATCTTCACCTAGATCCTTTTAAATTAATAAAT  
GAAGTTTGGCGCCGCAAATCAATCTAAAGTATATATGAGTAAACTTGGTCTGACAGTTACCAATGCTTAATCAGT  
GAGGCACCTATCTCAGCGATCTGTCTATTTTCGTTTCATCCATAGTTGCCTGACTCCCCGTCTGTAGATAACTACG  
ATACGGGAGGGCTTACCATCTGGCCCCAGTGCTGCAATGATACCGCGAGACCCACGCTCACCGGCTCCAGATTTA  
TCAGCAATAAACCAGCCAGCCGGAAGGGCCGAGCGCAGAAGTGGTCTGCAACTTTATCCGCTCCATCCAGTCT  
ATTAATTGTTGCCGGAAGCTAGAGTAAGTAGTTCGCCAGTTAATAGTTTGGCAACGTTGTTGCCATTGCTACA  
GGCATCGTGGTGTACGCTCGTCTGTTTGGTATGGCTTCATTACGCTCCGGTTCCCAACGATCAAGGCGAGTTACA  
TGATCCCCCATGTTGTGCAAAAAAGCGGTTAGCTCCTTCGGTCTCCGATCGTTGTCAGAAGTAAGTTGGCCGCA  
GTGTTATCACTCATGGTTATGGCAGCACTGCATAATTCTTACTGTGATGCCATCCGTAAGATGCTTTTCTGTG  
ACTGGTGTGACTCAACCAAGTCATTCTGAGAATAGTGTATGCGGCGACCGAGTTGCTCTTGGCCGGCGTCAACA  
CGGGATAATACCGCGCCACATAGCAGAACTTTAAAAGTGTCTCATTCATTGGAAAACGTTCTTCGGGGCGAAAAC  
TCAAGGATCTTACCGCTGTTGAGATCCAGTTGCATGTAACCCACTCGTGACCCAACTGATCTTCAGCATCTTTT  
ACTTTACCAGCGTTTCTGGGTGAGCAAAAAAGGAAAGGCAAAATGCCGAAAAAAGGGAATAAGGGCGACACGG  
AAATGTTGAATACTCATACTCTTCTTTTCAATATTATTGAAGCATTATCAGGGTATTGTCTCATGAGCGGA  
TACATATTTGAATGTATTTAGAAAAATAACAAATAGGGGTCCGCGCACATTTCCCCGAAAAGTGCCAC

**pL-U6-gRNA**

TGACATTGATTATTGTCTAGTTATTAATAGTAATCAATTACGGGGTATTAGTTCATAGCCCATATATGGAGTTC  
CGCGTTACATAAAGTACGGTAAATGGCCCGCTGGCTGACCGCCCAACGACCCCGCCATTGACGTCAATAATG  
ACGTATGTTCCCATAGTAACGCCAATAGGGACTTTCCATTGACGTCAATGGGTGGAGTATTTACGGTAAACTGCC  
CACTTGGCAGTACATCAAGTGTATCATATGCCAAGTACGCCCCCTATTGACGTCAATGACGGTAAATGGCCCGC  
TGGCATTATGCCAGTACATGACCTTATGGGACTTTCTACTTGGCAGTACATCTACGTATTAGTCATCGCTATT  
ACCATGGTGTGCGGTTTTGGCAGTACATCAATGGGCGTGGATAGCGGTTTACTCACGGGGATTTCCAAGTCTC  
CACCCCATGACGTCAATGGGAGTTTTGTTTTGGCACAAAATCAACGGGACTTTCCAAAATGTCGTAACAACCTC  
GCCCCATTGACGCAATGGGCGGTAGGCGTGTACGGTGGGAGGTCTATATAAGCAGAGCTCTCTGGCTAACTAGA  
GAACCCACTGCTTACTGGCTTATCGAAATTGGATCCATGGTGAGCAAGGGCGAGGAGCTGTTACCGGGGTGGTG  
CCCATCCTGGTCGAGCTGGACGGCGACGTAAACGGCCACAAGTTCAGCGTGTCCGGCGAGGGCGAGGGCGATGCC  
ACCTACGGCAAGCTGACCCTGAAGTTCATCTGCACCACCGCAAGTGTCCCGTGGCCCTGGCCACCCTCGTGACC  
ACCCTGACCTACGGCGTGCAGTGTTCAGCCGCTACCCCGACCACATGAAGCAGCAGGACTTCTTCAAGTCCGCC  
ATGCCCGAAGGCTACGTCCAGGAGCGCACCATCTTCTTCAAGGACGACGGCAACTACAAGACCCGCGCCGAGGTG  
AAGTTCGAGGGCGACACCCTGGTGAACCGCATCGAGCTGAAGGGCATCGACTTCAAGGAGGACGGCAACATCCTG  
GGGCACAAGCTGGAGTACAACATAACAGCCACAACGTCTATATCATGGCCGACAAGCAGAAGAACGGCATCAAG  
GTGAACCTCAAGATCCGCCACAACATCGAGGACGGCAGCGTGCAGCTCGCCGACCACTACCAGCAGAACCCCC  
ATCGGGCAGCGCCCCGTGCTGCTGCCGACAACCACTACCTGAGCACCCAGTCCGCCCTGAGCAAAGACCCCAAC  
GAGAAGCGGATCACATGGTCTGCTGGAGTTCGTGACCGCCCGGGATCACTCTCGGCATGGACGAGCTGTAC  
AAGTAAGGTACCTTTAAGACCAATGACTTACAAGGAGCTGTAGATCTTAGCCACTTTTTAAAAGAAAAGGGGGG  
ACTGGAAGGGCTAATTCACCTCCAACGAAGACAAGATCTGCTTTTTGCTTGTACTGGTCTCTCTGGTTAGACCA  
GATCTGAGCCTGGGAGCTCTCTGGCTAACTAGGGAACCACTGCTTAAGCCTCAATAAAGCTTGCCTTGAGTGT  
TCAAGTAGTGTGTGCCGCTGTTGTGTGACTCTGGTAACTAGAGATCCCTCAGACCCTTTTAGTCAGTGTGGAA  
AATCTCTAGCAGTAGTAGTTCATGTCATCTTATTATTAGTATTTATAACTTGCAAAGAAATGAATATCAGAGAG  
TGAGAGGAACCTGTTTATTGAGCTTATAATGGTTACAATAAAGCAATAGCATCACAAATTTACAAATAAAGC  
ATTTTTTTCACTGCATTCTAGTTGTGGTTTTGTCCAAACTCATCAATGTATCTTATCATGTCTGGCTCTAGCTATC  
CCGCCCTAACTCCGCCCATCCCGCCCTAACTCCGCCAGTTCGCCCATTTCTCCGCCCATGGCTGACTAATT  
TTTTTTATTTATGCAGAGGCCGAGGCCGCTCGGCCCTGAGCTATTCCAGAAGTAGTGAGGAGGCTTTTTTGGG  
GGCCTAGGGACGTACCCAATTCGCCCTATAGTGAGTCGTATTACGCGCGCTCACTGGCCGTCGTTTTACAACGTC  
GTGACTGGGAAAACCTGGCGTTACCCAACCTAATCGCCTTGACGACATCCCCCTTTCGCCAGCTGGCGTAATA  
GCGAAGAGGCCCGCACCGATCGCCCTTCCCAACAGTTGCGCAGCCTGAATGGCGAATGGGACGCGCCCTGTAGCG  
GCGCATTAAAGCGCGCGGGTGTGGTGGTTACGCGCAGCGTGACCGCTACACTTGCCAGCGCCCTAGCGCCCGCTC  
CTTTCGCTTTCTTCCCTTCTTTCTCGCCACGTTTCGCCGGCTTTCCCGTCAAGCTCTAAATCGGGGGCTCCCTT  
TAGGGTTCCGATTTAGTGCTTTACGGCACCTCGACCCCAAAAACTTGATTAGGGTGTGGTTCACGTAGTGGGC  
CATCGCCCTGATAGACGGTTTTTTCGCCCTTTCGACTTGGAGTCCACGTTCTTTAATAGTGGACTCTTGTCCAAA  
CTGGAACAACACTCAACCCTATCTCGGTCTATTCTTTTATTATAAGGGATTTTGGCGATTTTCGGCCTATTGGT  
TAAAAAATGAGCTGATTTAACAATAATTAACCGGAATTTTAAACAAAATATAACGCTTACAATTTAGGTGGCAC  
TTTTCGGGGAAATGTGCGCGGAACCCCTATTTGTTTATTTTTCTAAATACATTCAAATATGTATCCGCTCATGAG  
ACAATAACCCTGATAAATGCTTCAATAATATTGAAAAAGGAAGAGTATGAGTATTCAACATTTCCGTGTCCGCT  
TATTCCTTTTTTTCGGCATTTCGCTTCTGTTTTGCTCACCCAGAAACGCTGGTGAAGTAAAAGATGCTGA  
AGATCAGTTGGGTGCACGAGTGGGTTACATCGAAGTGGATCTCAACAGCGGTAAGATCCTTGAGAGTTTTCCGCC  
CGAAGAAGCTTTTCCAATGATGAGCACTTTTAAAGTTCTGCTATGTGGCGGGTATTATCCCGTATTGACGCGCG

GCAAGAGCAACTCGGTGCGCCGCATACACTATTCTCAGAATGACTTGGTTGAGTACTCACCAGTCACAGAAAAGCA  
TCTTACGGATGGCATGACAGTAAGAGAATTATGCAGTGCTGCCATAACCATGAGTGATAAACTGCGGCCAACTT  
ACTTCTGACAACGATCGGAGGACCGAAGGAGCTAACCGCTTTTTTGCACAACATGGGGGATCATGTAACCTCGCCT  
TGATCGTTGGGAACCGGAGCTGAATGAAGCCATACCAAACGACGAGCGTGACACCACGATGCCTGTAGCAATGGC  
AACAACGTTGCGCAAACCTATTAACCTGGCGAACTACTTACTCTAGCTTCCCGGCAACAATTAATAGACTGGATGGA  
GGCGGATAAAGTTGCGAGGACCCTTCTGCGCTCGGCCCTTCCGGCTGGCTGGTTTTATTGCTGATAAATCTGGAGC  
CGGTGAGCGTGGGTCTCGCGGTATCATTGCAGCACTGGGGCCAGATGGTAAGCCCTCCCGTATCGTAGTTATCTA  
CACGACGGGGAGTCAGGCAACTATGGATGAACGAAATAGACAGATCGCTGAGATAGGTGCCTCACTGATTAAGCA  
TTGGTAACTGTCAGACCAAGTTTACTCATATATACTTTAGATTGATTTAAAACCTTCATTTTTAATTTAAAAGGAT  
CTAGGTGAAGATCCTTTTTGATAATCTCATGACCAAAAATCCCTTAACGTGAGTTTTCGTTCCACTGAGCGTCAGA  
CCCCGTAGAAAAGATCAAAGGATCTTCTTGAGATCCTTTTTTCTGCGCGTAATCTGCTGCTTGCAAACAAAAA  
ACCACCGCTACCAGCGGTGGTTTGTTCGCGGATCAAGAGCTACCAACTCTTTTTCCGAAGGTAACCTGGCTTCAG  
CAGAGCGCAGATACCAATACTGTTCTTCTAGTGTAGCCGTAGTTAGGCCACCACTTCAAGAACTCTGTAGCACC  
GCCTACATACCTCGCTCTGCTAATCCTGTTACCAGTGGCTGCTGCCAGTGGCGATAAGTCGTGTCTTACCGGGT  
GGACTCAAGACGATAGTTACCGGATAAGGGCAGCGGTGCGGCTGAACGGGGGGTTCGTGCACACAGCCCAGCTT  
GGAGCGAACGACCTACACCGAACTGAGATACCTACAGCGTGAGCTATGAGAAAGCGCCACGCTTCCCGAAGGGAG  
AAAGGCGGACAGGTATCCGGTAAGCGGCAGGGTCGGAACAGGAGAGCGCACGAGGGAGCTTCCAGGGGAAACGC  
CTGGTATCTTTATAGTCTGTGCGGTTTTCGCCACCTCTGACTTGAGCGTCGATTTTTGTGATGCTCGTCAGGGG  
GCGGAGCCTATGGAAAAACGCCAGCAACGCGGCCCTTTTTACGGTTCCTGGCCTTTTGCTGGCCTTTTGCTCACAT  
GTTCTTTCTGCGTTATCCCCTGATTCTGTGGATAACCGTATTACCGCCTTTGAGTGAGCTGATACCGCTCGCCG  
CAGCCGAACGACCGAGCGCAGCGAGTCAGTGAGCGAGGAAGCGGAAGAGCGCCCAATACGCAAACCGCCTCTCCC  
CGCGCTTGGCCGATTCTTAATGCAGCTGGCAGCAGAGTTTCCCGACTGGAAAGCGGGCAGTGAGCGCAACGC  
AATTAATGTGAGTTAGCTCACTCATTAGGCACCCAGGCTTTACACTTTATGCTTCCGGCTCGTATGTTGTGTGG  
AATTGTGAGCGGATAACAATTTACACAGGAAACAGCTATGACCATGATTACGCCAAGCGCGCAATTAACCCCTCA  
CTAAAGGGAACAAAAGCTGGAGCTGCAAGCTTAATGTAGTCTTATGCAATACTCTTGTAGTCTTGCAACATGGTA  
ACGATGAGTTAGCAACATGCCTTACAAGGAGAGAAAAAGCACCGTGATGCCGATTGGTGGAAAGTAAGGTGGTAC  
GATCGTGCCTTATTAGGAAGGCAACAGACGGGTCTGACATGGATTGGACGAACCACTGAATTGCCGCATTGCAGA  
GATATTGATTTAAGTGCCTAGCTCGATACATAAACGGGTCTCTGTTAGACCAGATCTGAGCCTGGGAGCTC  
TCTGGCTAACTAGGGAACCCACTGCTTAAGCCTCAATAAAGCTTGCCTTGAGTGCTTCAAGTAGTGTGTGCCCGT  
CTGTTGTGTGACTCTGGTAACTAGAGATCCCTCAGACCCTTTTAGTCAGTGTGGAAAATCTCTAGCAGTGGCGCC  
CGAACAGGGACTTGAAAGCGAAAGGGAAACAGAGGAGCTCTCTGACGCAGGACTCGGCTTGCTGAAGCGCGCA  
CGGCAAGAGGGCAGGGGGCGGCGACTGGTGTGATACGCCAAAAATTTTACTAGCGGAGGCTAGAAGGAGAGATG  
GGTGGGAGAGCGTCAGTATTAAGCGGGGGAGAATTAGATCGCGATGGGAAAAAATTCGGTTAAGGCCAGGGGGAA  
AGAAAAATATAAATTAACATATAGTATGGCAAGCAGGGAGCTAGAACGATTTCGAGTTAATCCTGGCCTGT  
TAGAAACATCAGAAGGCTGTAGACAAATACTGGGACAGCTACAACCATCCCTTCAGACAGGATCAGAAGAATTA  
GATCATTATATAATACAGTAGCAACCCTCTATTGTGTGCATCAAAGGATAGAGATAAAAGACACCAAGGAAGCTT  
TAGACAAGATAGAGGAAGAGCAAAAACAAAAGTAAGACCACCGCACAGCAAGCGGCCGCTGATCTTCAGACCTGGA  
GGAGGAGATATGAGGGACAATTGGAGAAGTGAATTATATAAATATAAAGTAGTAAAAATGAACCATTAGGAGTA  
GCACCCACCAAGGCAAAGAGAAGAGTGGTGCAGAGAGAAAAAAGAGCAGTGGGAATAGGAGCTTTGTTCTTGGG  
TTCTTGGGAGCAGCAGGAAGCACTATGGGCGCAGCGTCAATGACGCTGACGGTACAGGCCAGACAATTATTGTCT  
GGTATAGTGCAGCAGCAGAACAATTTGCTGAGGGCTATTGAGGCGCAACAGCATCTGTTGCAACTCACAGTCTGG  
GGCATCAAGCAGCTCCAGGCAAGAATCCTGGCTGTGAAAGATACCTAAAGGATCAACAGCTCCTGGGGATTTGG  
GGTTGCTCTGAAAACCTATTTGCACCACTGCTGTGCCTTGAATGCTAGTTGGAGTAATAAATCTCTGGAACAG  
ATTTGGAATCACACGACCTGGATGGAGTGGGACAGAGAAATTAACAATTACACAAGCTTAATACACTCCTTAATT  
GAAGAATCGAAAACAGCAAGAAAAGAATGAACAAGAATTATTGGAATTAGATAAATGGGCAAGTTTGTGGAAT  
TGGTTTAACATAACAAATTGGCTGTGGTATATAAAATTTATTCATAATGATAGTAGGAGGCTTGGTAGGTTAAGA  
ATAGTTTTTGTGACTTTCTATAGTGAATAGAGTTAGGCAGGATATTCACCATTATCGTTTTAGACCCACCTC  
CCAACCCCGAGGGGACCCGACAGGCCCGAAGGAATAGAAGAAGAAGGTGGAGAGAGAGACAGAGACAGATCCATT  
CGATTAGTGAACGGATCTCGACGGTATCGATCACGAGACTAGCCTCGAGCGGCCGCCCTTACCGAGGGCCTA  
TTTTCCCATGATTCCTTCATATTTGCATATACGATACAAGGCTGTTAGAGAGATAAATTGGAATTAATTTGACTGTA  
AACACAAAGATATTAGTACAAAATACGTGACGTAGAAAAGTAATAATTTCTTGGGTAGTTTGCAGTTTTAAATTA  
TGTTTTAAATGGACTATCATATGCTTACCGTAACTTGAAAGTATTCGATTTCTTGGCTTTATATATCTTGTGG  
AAAGGACGAAACACCGGGCCCTCGATATCGACTAGTCCGTTATCAACTTGAAAAAGTGGCACCGAGTCGGTGCTT  
TTTTTCGATGCGGATACTGCAGACAAATGGCAGTATTCATCCACAATTTTAAAAGAAAAGGGGGGATTGGGGGGT  
ACAGTGCAGGGGAAAGAATAGTAGACATAATAGCAACAGACATACAACTAAAGAATTACAAAAACAAATTACAA  
AAATTCAAAATTTTCCGGTTTATTACAGGGACAGCAGAGATCCAGTGGCGCGT

**pRZ-CMV-Cas9**

GACGGATCGGGAGATCTCCCGATCCCCTATGGTGCCTCTCAGTACAATCTGCTCTGATGCCGCATAGTTAAGCC  
AGTATCTGCTCCCTGCTTGTGTGTTGGAGGTGCTGAGTAGTGCGCGAGCAAAATTAAGCTACAACAAGGCAAG

GCTTGACCGACAATTGCATGAAGAATCTGCTTAGGGTTAGGCGTTTTGCGCTGCTTCGCGAGTTGACATTGATTA  
TTGACTAGTTATTAATAGTAATCAATTACGGGGTCATTAGTTCATAGCCCATATATGGAGTTCGCGTTACATAA  
CTTACGGTAAATGGCCCGCTGGCTGACCGCCCAACGACCCCGCCATTGACGTCAATAATGACGTATGTTCCC  
ATAGTAACGCCAATAGGGACTTTCCATTGACGTCAATGGGTGGAGTATTTACGGTAAACTGCCACTTGGCAGTA  
CATCAAGTGTATCATATGCCAAGTACGCCCCCTATTGACGTCAATGACGGTAAATGGCCCGCTGGCATTATGCC  
CAGTACATGACCTTATGGGACTTTCTACTTGGCAGTACATCTACGTATTAGTCATCGCTATTACCATGGTGATG  
CGTTTTGGCAGTACATCAATGGGCGTGATAGCGGTTTACTCACGGGATTTCCAAGTCTCCACCCCATTTGAC  
GTCAATGGGAGTTTGTGGTGGCACAAAATCAACGGGACTTTCCAAAATGTCTGTAACAACTCCGCCCCATTGACG  
CAAATGGGCGGTAGGCGTGTACGGTGGGAGGTCTATATAAGCAGAGCTCAATAAAAGAGCCACAACCCCTCACT  
CGGCGCGCCAGTCTTCCGATAGACTGCGTCGCCCCGGTACCCGTATTTCCCAATAAAGCCTCTTGCTGTTTGCATC  
CGAATCGTGGTCTCGCTGTTCTTGGGAGGGTCTCTCTGAGTGATTGACTACCCACGACGGGGTCTTTCAATTT  
GGGGCTCGTCCGGATTTGGAGACCCCTGCCAGGGACCACCGACCCACCACCGGGAGGTAAGCTGGCCAGCAA  
CTTATCTGTGTCTGTCCGATTGTCTAGTGTCTATGTTTGTATGCGCCTGCGTCTGTAAGTACTAGTAACT  
AGCTCTGTATCTGGCGACCCGTGGTGGAACTGACGAGTCTGAACACCCGGCCGCAACCCTGGGAGACGTCCA  
GGACTTTGGGGCCGTTTTTGTGGCCCCGACCTGAGGAAGGGAGTCTGATGGAATCCGACCCCGTCAGGATATG  
TGGTTCTGGTAGGAGACGAGAACCTAAACAGTTCGCGCTCCGTCTGAAATTTTGGTTTGGTGGAAACCGAA  
GCCGCGCTTGTCTGCTGCAGCGCTGCAGCATCGTCTGTGTGTCTCTGTCTGACTGTGTTTCTGTATTTGT  
CTGAAAATTAGGGCCAGACTGTTACCACTCCCTTAAAGTTTACCTTAGGTCAGTGGAAAGATGTCGAGCGGATCG  
CTCACAACCAGTCGGTAGATGTCAAGAAGAGACGTTGGTTACCTTCTGCTCTGAGAATGGCCAACCTTAAACG  
TCGGATGGCCGCGAGACGGCACCTTAAACCGAGACCTCATCACCCAGGTTAAGATCAAGGTCTTTTACCTGGCC  
CGCATGGACACCCAGACAGGTCCCCTACATCGTGACCTGGGAAGCCTTGGCTTTTACCCCCCTCCCTGGTCA  
AGCCCTTTGTACACCCTAAGCCTCCGCTCCTCTTCTCCATCCGCCCCGTCTCCCCCTTGAACCTCCTCGTT  
CGACCCCGCTCGATCCTCCCTTATCCAGCCCTCACTCCTCTCTAGGCGCCTCCGGACCACCATGGCCAAGTT  
GACCAGTGGCGTTCGGTGTCTCACCGCGCGCAGCTCGCCGGAGCGGTGAGTCTGGACCGACCGGCTCGGGTT  
CTCCCGGACTTCGTGGAGGACGACTTCGCGCGTGTGGTCCGGGACGACGTCGACCTGTTTATCAGCGCGGTCCA  
GGACCAGGTGGTGGCGACAACACCCTGGCCTGGGTGTGGGTGGCGGCCCTGGACGAGCTGTACGCCGAGTGGTC  
GGAGGTCTGTCCACGAACCTTCGGGACGCTCCGGGCCGGCCATGACCGAGATCGGCGAGCAGCCGTGGGGGGC  
GGAGTTCGCCCTGCGCGACCCGGCCGCAACTGCGTGCATTCGTGGCGAGGAGCAGGACTGAAGATCCGGCCA  
TTAGCCATATTATTATTGGTTATATAGCATAAATCAATATTGGCTATTGGCCATTGCATACGTTGTATCCATAT  
CATAATATGTACATTTATATTGGCTCATGTCCAACATTACCGCCATGTTGACATTGATTATTGACTAGTTATTA  
TAGTAATCAATTACGGGGTCATTAGTTCATAGCCCATATATGGAGTTCGCGTTACATAACTTACGGTAAATGGC  
CCGCTGGCTGACCGCCCAACGACCCCGCCATTGACGTCAATAATGACGTATGTTCCCATAGTAACGCCAATA  
GGGACTTTCCATTGACGTCAATGGGTGGAGTATTTACGGTAAACTGCCACTTGGCAGTACATCAAGTGTATCAT  
ATGCCAAGTACGCCCCCTATTGACGTCAATGACGGTAAATGGCCCGCTGGCATTATGCCAGTACATGACCTTA  
TGGGACTTTCTACTTGGCAGTACATCTACGTATTAGTCATCGCTATTACCATGGTGATGGGTTTTGGCAGTAC  
ATCAATGGGCGTGGATAGCGTTTTGACTCACGGGATTTCCAAGTCTCACCCCATTTGACGTCAATGGGAGTTT  
TTTTGGCACAAAATCAACGGGACTTTCCAAAATGTCTGTAACAACTCCGCCCCATTGACGCAAATGGGCGGTAGG  
CGTGTACGGTGGGAGGTCTATATAAGCAGAGCTCGTTTGTAGTGAACCGTCAGATCGCCTGGAGACGCCATCCACGC  
TGTTTTGACCTCCATAGAAGACACCGGGACCGATCCAGCCTCCGCGGCCCAAGCTTCCGCGTACGGCCACCATG  
GATTATAAGGATGACGACGATAAGGTGAGCAAGGGCGAGGAGGATAACATGGCCATCATCAAGGAGTTCATGGC  
TTCAAGGTGCACATGGAGGGCTCCGTGAACGGCCACGAGTTCGAGATCGAGGGCGAGGGCGAGGGCCGCCCTAC  
GAGGGCACCCAGACCGCAAGCTGAAGGTGACCAAGGGTGGCCCCCTGCCCTTCGCTGGGACATCCTGTCCCCT  
CAGTTCATGTACGGCTCCAAGGCCTACGTGAAGCACCCCGCCGACATCCCCGACTACTTGAAGCTGTCTTCCCC  
GAGGGCTTCAAGTGGGAGCGCGTGATGAACTTCGAGGACGGCGCGTGGTGACCGTACCCAGGACTCCTCCCTG  
CAGGACGGCGAGTTCATCTACAAGGTGAAGCTGCGCGCACCAACTTCCCCTCCGACGGCCCCGTAATGCAGAAG  
AAGACCATGGGCTGGGAGGCCTCCTCCGAGCGGATGTACCCCGAGGACGGCGCCCTGAAGGGCGAGATCAAGCAG  
AGGCTGAAGCTGAAGGACGGCGGCCACTACGACGCTGAGGTCAAGACCACCTACAAGGCCAAGAAGCCCGTGCAG  
CTGCCCGCGCCTACAACGTCAACATCAAGTTGGACATCACTCCCACAACGAGGACTACACCATCGTGGAAACAG  
TACGAACGGCGCGAGGGCCGCACTCCACCGCGGCATGGACGAGCTGTACAAGGTGCTACCATCGAGGGATCC  
GGAGAGGGCAGAGGAAGTCTGCTAACATGCGGTGACGTGAGGAGAATCCTGGCCCAATGGACAAGAAGTACAGC  
ATCGGCCTGGACATCGGCACCAACAGCGTGGGCTGGGCCGTGATCACCGACGAGTACAAGGTGCCAGCAAGAAG  
TTCAAGGTGCTGGGCAACACCGACCGCCACAGCATCAAGAAGAACCTGATCGGCGCCCTGCTGTTGACAGCGGC  
GAGACCGCGAGGCCACCCGCTGAAGCGCACCGCCCGCCGCTACACCCCGCGCAAGAACCGCATCTGCTAC  
CTGCAGGAGATCTTACGAACGAGATGGCAAGGTGGACGACAGCTTCTTCCACCGCCTGGAGGAGAGCTTCTG  
GTGGAGGAGGACAAGAAGCAGAGCGCCACCCATCTTCCGCAACATCGTGGACGAGGTGGCCTACCACGAGAAG  
TACCCACCATCTACCACCTGCGCAAGAAGCTGGTGGACAGCACCGACAAGGCCGACCTGCGCCTGATCTACCTG  
GCCCTGGCCACATGATCAAGTTCCGCGCCACTTCTGATCGAGGGCGACCTGAACCCCGACAACAGCGACGTG  
GACAAGCTGTTTATCCAGCTGGTGCAGACCTACAACCAGCTGTTTCGAGGAGAACCCCATCAACGCCAGCGCGTG  
GACGCCAAGGCCATCCTGAGCGCCCGCTGAGCAAGAGCCCGCCTGGAGAACCTGATCGCCAGCTGCCCGGC  
GAGAAGAAGAACGGCCTGTTCCGCAACCTGATCGCCCTGAGCCTGGCCTGACCCCAACTTCAAGAGCAACTTC

GACCTGGCCGAGGACGCCAAGCTGCAGCTGAGCAAGGACACCTACGACGACGACCTGGACAACCTGCTGGCCCAG  
ATCGGCGACCAGTACGCCGACCTGTTCTGCGCCGAAGAACCTGAGCGACGCCATCCTGCTGAGCGACATCCTG  
CGCGTGAACACCCGAGATCACCAAGGCCCCCTGAGCGCCAGCATGATCAAGCGCTACGACGAGCACCACCAGGAC  
CTGACCCTGCTGAAGGCCCTGGTGCGCCAGCAGCTGCCCGAGAAGTACAAGGAGATCTTCTTCGACCAGAGCAAG  
AACGGCTACGCCGGCTACATCGACGGCGGCCAGCCAGGAGGAGTTCTACAAGTTCATCAAGCCCATCCTGGAG  
AAGATGGACGGCACCGAGGAGCTGCTGGTGAAGCTGAACCGCGAGGACCTGCTGCGCAAGCAGCGCACCTTCGAC  
AACGGCAGCATCCCCACCAGATCCACCTGGGCGAGCTGCACGCCATCCTGCGCCGCCAGGAGGACTTCTACCCC  
TTCCTGAAGGACAACCGCGAGAAGATCGAGAAGATCCTGACCTTCCGCATCCCCTACTACGTGGGCCCCCTGGCC  
CGCGGCAACAGCCGCTTCGCCTGGATGACCCGCAAGAGCGAGGAGACCATCACCCCCTGGAACCTTCGAGGAGGTG  
GTGGACAAGGGCGCCAGCGCCCAGAGCTTCATCGAGCGCATGACCAACTTCGACAAGAACCTGCCCAACGAGAAG  
GTGCTGCCCAAGCACAGCCTGCTGTACGAGTACTTCACCGTGTACAACGAGCTGACCAAGGTGAAGTACGTGACC  
GAGGGCATGCGCAAGCCCCGCTTCCTGAGCGGCGAGCAGAAGAAGGCCATCGTGGACCTGCTGTTCAAGACCAAC  
CGCAAGGTGACCGTGAAGCAGCTGAAGGAGGACTACTTCAAGAAGATCGAGTGTTCGACAGCGTGGAGATCAGC  
GGCGTGGAGGACCGCTTCAACGCCAGCCTGGGCACCTACCACGACCTGCTGAAGATCATCAAGGACAAGGACTTC  
CTGGACAACGAGGAGAACGAGGACATCCTGGAGGACATCGTGCTGACCCTGACCCTGTTTCGAGGACCCGCGAGATG  
ATCGAGGAGCGCCTGAAGACCTACGCCACCTGTTTCGACGACAAGGTGATGAAGCAGCTGAAGCGCCGCCGCTAC  
ACCGGCTGGGGCCGCTGAGCCGCAAGCTGATCAACGGCATCCGCGACAAGCAGAGCGGCAAGACCATCCTGGAC  
TTCCTGAAGAGCGACGGCTTCGCCAACCGCAACTTCATGCAGCTGATCCACGACGACAGCCTGACCTTCAAGGAG  
GACATCCAGAAGGCCAGGTGAGCGGCCAGGGCGACAGCCTGCACGAGCACATCGCCAACCTGGCCGGCAGCCCC  
GCCATCAAGAAGGGCATCCTGCAGACCGTGAAGGTGGTGGACGAGCTGGTGAAGGTGATGGCCCGCCACAAGCCC  
GAGAACATCGTGATCGAGATGGCCCGGAGAACCAGACCACCCAGAAGGGCCAGAAGAACAGCCCGCAGCGCATG  
AAGCGCATCGAGGAGGGCATCAAGGAGCTGGGCAGCCAGATCCTGAAGGAGCACCCCGTGGAGAACACCCAGCTG  
CAGAACGAGAAGCTGTACTCTACTACCTGCAGAACCGCCGACATGTACGTGGACCAGGAGCTGGACATCAAC  
CGCCTGAGCGACTACGACGTGGACCACATCGTGCCCAAGACTTTCCTGAAGGACGACAGCATCGACAACAAGGTG  
CTGACCCCGCAGCGACAAGAACCAGCGGCAAGAGCGACAACGTGCCAGCGAGGAGGTGGTGAAGAAGATGAAGAAC  
TACTGGCGCAGCTGCTGAACGCCAAGCTGATCACCCAGCGCAAGTTCGACAACCTGACCAAGGCCGAGCGCGGC  
GGCCTGAGCGAGCTGGACAAGGCCGCTTCATCAAGCGCCAGCTGGTGGAGACCCGCCAGATCACCAAGCACGTG  
GCCCAGATCCTGGACAGCCGCATGAACACCAAGTACGACGAGAACGACAAGCTGATCCGCGAGGTGAAGGTGATC  
ACCCTGAAGAGCAAGCTGGTGGAGGACTTCCGCAAGGACTTCCAGTTCACAAGGTGCGCGAGATCAACAACACTAC  
CACCACGCCACGACGCCTACCTGAACGCCGTGGTGGGCACCCGCCCTGATCAAGAAGTACCCCAAGCTGGAGAGC  
GAGTTCGTGTACGGCGACTACAAGGTGTACGACGTGCGCAAGATGATCGCCAAGAGCGAGCAGGAGATCGGCAAG  
GCCACCGCCAAGTACTTCTTCTACAGCAACATCATGAACTTCTTCAAGACCGAGATCACCCCTGGCCAACGGCGAG  
ATCCGCAAGCGCCCCCTGATCGAGACCAACGGCGAGACCGGCGAGATCGTGTGGGACAAGGGCCGCGACTTCGCC  
ACCGTGGCAAGGTGCTGAGCATGCCCCAGGTGAACATCGTGAAGAAGACCGAGGTGCAGACCCGGCGGCTTCAGC  
AAGGAGAGCATCCTGCCCAAGCGCAACAGCGACAAGCTGATCGCCCGCAAGAAGGACTGGGACCCCAAGAAGTAC  
GGCGGCTTCGACAGCCCCACCGTGGCCTACAGCGTGTGGTGGTGGCAAGGTGGAGAAGGGCAAGAGCAAGAAG  
CTGAAGAGCGTGAAGGAGCTGCTGGGCATCACCATCATGGAGCGCAGCAGCTTCGAGAAGAACCCCATCGACTTC  
CTGGAGGCCAAGGGCTACAAGGAGGTGAAGAAGGACCTGATCATCAAGCTGCCCAAGTACAGCCTGTTTCGAGCTG  
GAGAACGGCCGCAAGCGCATGCTGGCCAGCGCCGGCGAGCTGCAGAAGGGCAACGAGCTGGCCCTGCCAGCAAG  
TACGTGAACTTCTGTACTTGGCCAGCCACTACGAGAAGCTGAAGGGCAGCCCCGAGGACAACGAGCAGAAGCAG  
CTGTTCTGTGAGCAGCACAAAGCACTACCTGGACGAGATCATCGAGCAGATCAGCGAGTTCAGCAAGCGCGTGTAC  
CTGGCCGACGCCAACCTGGACAAGGTGCTGAGCGCCTACAACAAGCACCCGCGACAAGCCATCCGCGAGCAGGCC  
GAGAACATCATCCACCTGTTACCCTGACCAACCTGGGCGCCCCCGCCGCTTCAAGTACTTCGACACCACCATC  
GACCGCAAGCGCTACACCAGCACCAAGGAGGTGCTGGACGCCACCCTGATCCACCAGAGCATCACCGGCTGTAC  
GAGACCCGCATCGACCTGAGCCAGCTGGGCGGCGACAGCCGCGCCGACCCCAAGAAGAAGCGCAAGGTGTGAGCG  
GCCGCATCGATAAAAATAAAAGATTTTTATTTAGTCTCCAGAAAAAGGGGGAATGAAAGACCCACCTGTAGGTTT  
GGCAAGCTAGCTTAAGTAACGCCATTTTTGCAAGGCATGAAAAAATACATAACTGAGAATAGAGAAGTTCAGATCA  
AGGTGAGGAACAGATGGAACAGCTGAATATGGGCCAAAACAGGATATCTGTGGTAAGCAGTTCCTGCCCCGGCTCA  
GGGCCAAGAACAGATGGTCCCCAGATGCGGTCCAGCCCTCAGCAGTTTCTAGAGAACCATCAGATGTTTCCAGGG  
TGCCCAAGGACCTGAAATGACCCTGTGCCTTATTTGAACTAACCAATCAGTTCGCTTCTCGCTTCTGTTTCGCGC  
GCTTCTGCTCCCCGAGCTCAATAAAAAGAGCCCAACCCCTCACTCGGGCGCCAGTCTCCGATTGACTGAGTC  
GCCCGGGTACCCGTGTATCCAATAAACCCCTCTTGCAATTGCATCCGACTTGTGGTCTCGCTGTTTCTTGGGAGGG  
TCTCCTCTGAGTGATTGACTACCCGTGAGCGGGGTCTTTCAATTTGGGGCTCGTCCGGGATCGGGAGACCCCTG  
CCCAGGGACCACCGACCCACCACCGGGAGGTAAGCTGGGAATAATTCTGTGGAATGTGTGTCAGTTAGGGTGTG  
GAAAGTCCCCAGGCTCCCCAGCAGGCAGAAGTATGCAAAGCATGCATCTCAATTAGTCAGCAACCAGGTGTGGAA  
AGTCCCCAGGCTCCCCAGCAGGCAGAAGTATGCAAAGCATGCATCTCAATTAGTCAGCAACCAGGTGTGGAA  
TAACTCCGCCATCCCCGCCCTAACTCCGCCAGTTCGCCCATTCGCCCCATGGCTGACTAATTTTTTTTTTA  
TTTTATGCAGAGGCCGAGGCCGCTCTGCCTCTGAGCTATTCCAGAAGTAGTGAGGAGGCTTTTTTGGAGGCCTAG  
TACCGTCGACCTCTAGCTAGAGCTTGGCGTAATCATGGTCATAGCTGTTTCTGTGTAAATTGTTATCCGCTCA

CAATTCACACAACATACGAGCCGGAAGCATAAAGTGTAAAGCCTGGGGTGCCTAATGAGTGAGCTAACTCACAT  
TAATTGCGTTGCGCTCACTGCCCCGCTTTCCAGTCGGGAAACCTGTCTGCGCCAGCTGCATTAATGAATCGGCCAAC  
GCGCGGGGAGAGGGCGGTTTTGCGTATTGGGCGCTCTTCCGCTTCTCTGCTCACTGACTCGCTGCGCTCGGTGCTTC  
GGCTGCGGCGAGCGGTATCAGCTCACTCAAAGCGGTAATACGGTTATCCACAGAATCAGGGGATAACGCAGGAA  
AGAACATGTGAGCAAAAGGCCAGCAAAAAGGCCAGGAACCGTAAAAAGGCCGCTTGTGGCGTTTTTCCATAGGC  
TCCGCCCCCTGACGAGCATCAAAAAATCGACGCTCAAGTCAGAGGTGGCGAAACCCGACAGGACTATAAAGAT  
ACCAGGCGTTTTCCCCTGGAAGCTCCCTCGTGCGCTCTCTGTTCCGACCCTGCCGCTTACCGGATACCTGTCCG  
CCTTTCTCCCTTCGGAAGCGTGGCGTTTTCTCAATGCTCACGCTGTAGGTATCTCAGTTCGGTGTAGGTGCTTC  
GCTCCAAGCTGGGCTGTGTGCACGAACCCCCGTTACGCCCGACCCTGCGCCTTATCCGGTAACTATCGTCTTG  
AGTCCAACCCGGTAAGACACGACTTATCGCCACTGGCAGCAGCCACTGGTAACAGGATTAGCAGAGCGAGGTATG  
TAGGCGGTGCTACAGAGTTCTTGAAGTGGTGGCCTAACTACGGCTACACTAGAAGGACAGTATTTGGTATCTGCG  
CTCTGCTGAAGCCAGTTACCTTCGGAAAAAGAGTTGGTAGCTCTTGATCCGGCAAACAACCACCGCTGGTAGCG  
GTGGTTTTTTTGTGTTGCAAGCAGCAGATTACGCGCAGAAAAAAGGATCTCAAGAAGATCCTTTGATCTTTTCTA  
CGGGGTCTGACGCTCAGTGAACGAAAACCTCACGTTAAGGGATTTTGGTCATGAGATTATCAAAAAGGATCTTCA  
CCTAGATCCTTTAAATTAATAAATGAAGTTTTAAATCAATCTAAAGTATATATGAGTAACTTGGTCTGACAGTT  
ACCAATGCTTAATCAGTGAGGCACCTATCTCAGCGATCTGTCTATTTTCGTTTCATCCATAGTTGCCTGACTCCCCG  
TCGTGTAGATAACTACGATACGGGAGGGCTTACCATCTGGCCCCAGTGCTGCAATGATACCGCGAGACCCACGCT  
CACCGGCTCCAGATTTATCAGCAATAAACAGCCAGCCGGAAGGGCCGAGCGCAGAAGTGGTCTGCAACTTTAT  
CCGCCTCCATCCAGTCTATTAATTGTTGCCGGAAAGCTAGAGTAAGTAGTTCGCCAGTTAATAGTTTGGCAACG  
TTGTTGCCATTGCTACAGGCATCGTGGTGTACGCTCGTCTGTTGGTATGGCTTCATTACGCTCCGGTCCCAAC  
GATCAAGGCGAGTTACATGATCCCCATGTTGTGCAAAAAAGCGTTAGTCTCTTCGGTCTCCGATCGTTGTCA  
GAAGTAAGTTGGCCGAGTGTATCACTCATGGTTATGGCAGCACTGCATAATTCTTACTGTCTGATGCCATCCG  
TAAGATGCTTTTTCTGTGACTGGTGAGTACTCAACCAAGTCATTCTGAGAATAGTGTATGCCGGACCGAGTTGCT  
CTTGCCCCGGCGTCAATACGGGATAATACCGGCCACATAGCAGAACTTTAAAAGTGCTCATCATTGGAAAACGTT  
CTTCGGGGCGAAAACCTCTCAAGGATCTTACCGCTGTTGAGATCCAGTTCGATGTAACCCACTCGTGCACCCAAC  
GATCTTCAGCATCTTTTACTTTACCAGCGTTTTCTGGGTGAGCAAAAAACAGGAAGGCAAAATGCCGCAAAAAAGG  
GAATAAGGGCGACACGGAAATGTTGAATACTCATACTCTTCTTTTTCAATATTATTGAAGCATTTATCAGGGTT  
ATTGTCTCATGAGCGGATACATATTTGAATGTATTTAGAAAAATAAACAAATAGGGGTTCCGCGCACATTTCCCC  
GAAAAGTGCCACCTGACGTC

**pBABE-U6-gRNA-Cas9**

CTGCAGCCTGAATATGGGCCAAACAGGATATCTGTGGTAAGCAGTTCCTGCCCCGGCTCAGGGCCAAGAACAGAT  
GGAACAGCTGAATATGGGCCAAACAGGATATCTGTGGTAAGCAGTTCCTGCCCCGGCTCAGGGCCAAGAACAGAT  
GGTCCCCAGATGCGGTCCAGCCCTCAGCAGTTTCTAGAGAACCATCAGATGTTTCCAGGGTGCSCCAAGGACCTG  
AAATGACCCTGTGCCTATTTGAACTAACCAATCAGTTCGCTTCTCGTTCGTTCTGTTCCGCGGCTTCTGCTCCCCGA  
GCTCAATAAAAGAGCCACAACCCCTCACTCGGGGCGCAGTCTCCGATTGACTGAGTCGCCCCGGGTACCCGCTG  
TATCCAATAAACCCCTCTTGAGTTGCATCCGACTTGTGGTCTCGCTGTTCTTGGGAGGGTCTCCTCTGAGTGAT  
TGACTACCCGTGAGCGGGGTCTTTCATTTGGGGCTCGTCCGGATCGGGAGACCCCTGCCAGGGACCACCGA  
CCCACCACCGGGAGGTAAGCTGGCCAGCAACTTATCTGTGTCTGTCCGATTGTCTAGTGTCTATGACTGATTTTA  
TGCGCCTGCGTGGTACTAGCTAGTTAGCTAACTAGCTCTGTATCTGGCGGACCCGTGGTGGAACTGACGAGTTC  
TGAACACCCCGCCGCAACCCCTGGGAGACGTCCAGGGACTTTGGGGCCGTTTTTGTGGCCGACCTGAGGAAGG  
GAGTCGATGTGGAATCCGACCCCGTCAAGATATGTGGTCTGGTAGGAGACGAGAACCTAAAACAGTTCCCGCCT  
CCGTCTGAATTTTTGCTTTCCGTTTTGGAACCGAAGCCGCGCTCTGTCTGCTGCAGCATCGTTCTGTGTTGTCT  
CTGTCTGACTGTGTTTCTGTATTTGTCTGAAAATTAGGGCCAGACTGTTACCACTCCCTAAGTTTGACCTTAGA  
TCACTGGAAAGATGTGAGCGGCTCGCTCACAACCAGTCGGTAGATGTCAAGAAGAGACGTTGGGTTACCTTCTG  
CTCTGCAGAATGGCCAACCTTTAACGTCCGATGGCCCGGAGACGGCACCTTTAACCAGACCTCATCACCCAGGT  
TAAGATCAAGGTCTTTTACCTGGCCCCGATGGACACCCAGACCAGTCCCCTACATCGTGACCTGGGAAGCCTT  
GGTTTTGACCCCTCCCTGGGTCAAGCCCTTTGTACACCTAAGCCTCCGCCTCCTCTTCTTCCATCCGCGCC  
GTCTCTCCCCCTGAACCTCCTCTTTGACCCCGCTCAATCCTCCCTTATCCAGCCCTCACTCCTTCTTAGG  
CGCCGGCCGGATCCGAGGGCCTATTTCCCATGATTCCTTCATATTTGCATATACGATACAAGGCTGTTAGAGAGA  
TAATTGGAATTAATTTGACTGTAAACACAAAGATATTAGTACAAAATACGTGACGTAGAAAGTAATAATTTCTTG  
GGTAGTTTGCAGTTTTAAAATTATGTTTTAAAATGGACTATCATATGCTTACCGTAACTTAAAAGTATTTTCGATT  
TCTTGGCTTTATATATCTTGTGGAAAGGACGAAACACCCGGGCCCTCGATATCGACTAGTCCGTTATCAACTGAA  
AAAGTGGCACCGAGTCCGTGCTTTTTTTTGAATTCGCCAGCACAGTGGTCCGACGTTGACATTGATTATTGTCTAG  
TTATTAATAGTAATCAATTACGGGGTCATTAGTTCATAGCCCATATATGGAGTTCGCGGTTACATAACTTACGGT  
AAATGGCCCGCCTGGCTGACCGCCCAACGACCCCGCCATTGACGTCAATAATGACGTATGTTCCCATAGTAAC  
GCCAATAGGGACTTTCCATTGACGTCAATGGGTGGAGTATTTACGGTAACTGCCCACTTGGCAGTACATCAAGT  
GTATCATATGCCAAGTACGCCCCCTATTGACGTCAATGACGGTAAATGGCCCGCCTGGCATTATGCCAGTACAT  
GACCTTATGGGACTTTCTACTTGGCAGTACATCTACGTATTAGTCATCGCTATTACCATGGTGATGCGGTTTTG  
GCAGTACATCAATGGGCGTGGATAGCGGTTTTGACTCACGGGATTTCCAAGTCTCCACCCCAATTGACGTCAATGG

GAGTTTGTGGACCAAATCAACGGGACTTTCCAAAATGTCGTAACAACTCCGCCCCATTGACGCAAATGGG  
CGGTAGGCGTGTACGGTGGGAGGTCTATATAAGCAGAGCTCGTTTGTGAAACCGTCAGATCGCCTGGAGACGCCA  
TCCACGCTGTTTTGACCTCCATAGAAGACACCGGGACCGATCCAGCCTCCGCGGCCCAAGTTCCGCGTACGGC  
CACCATGGATTATAAGGATGACGACGATAAGGTGAGCAAGGGCGAGGAGGATAACATGGCCATCATCAAGGAGTT  
CATGCGCTTCAAGGTGCACATGGAGGGCTCCGTGAACGGCCACGAGTTCGAGATCGAGGGCGAGGGCGAGGGCCG  
CCCCTACGAGGGCACCCAGACCCGCAAGCTGAAGGTGACCAAGGGTGGCCCCCTGCCCTTCGCCTGGGACATCCT  
GTCCCCTCAGTTCATGTACGGCTCCAAGGCTACGTGAAGCACCCCGCGGACATCCCCGACTACTTGAAGCTGTC  
CTTCCCCGAGGGCTTCAAGTGGGAGCGCGTGTGAACCTTCGAGGACGGCGGCGTGGTACCGTGACCCAGGACTC  
CTCCCTGCAGGACGGCGAGTTCATCTACAAGGTGAAGCTGCGCGGCACCACTTCCCCTCCGACGGCCCCGTAAT  
GCAGAAGAAGACCATGGGCTGGGAGGCTCCTCCGAGCGGATGTACCCCGAGGACGGCGCCCTGAAGGGCGAGAT  
CAAGCAGAGGCTGAAGCTGAAGGACGGCGGCCACTACGACGCTGAGGTCAAGACCACCTACAAGGCCAAGAAGCC  
CGTGACGCTGCCCCGGCGCCTACAACGTCAACATCAAGTTGGACATCACCTCCACAACGAGGACTACACCATCGT  
GGAACAGTACGAACGCGCCGAGGGCCGCCACTCCACCGCGGCATGGACGAGCTGTACAAGTTCGCTACCATCGA  
GGGATCCGGAGAGGGCAGAGGAAGTCTGCTAACATGCGGTGACGTGAGGAGAATCCTGGCCCAATGGACAAGAA  
GTACAGCATCGGCCTGGACATCGGCACCAACAGCGTGGGCTGGGCCGTGATCACCGACGAGTACAAGGTGCCAG  
CAAGAAGTTCAAGGTGCTGGGCAACACCGACCCGCAAGCATCAAGAAGAACCTGATCGGCGCCCTGCTGTTTGA  
CAGCGGCGAGACCCGCGAGGGCCACCCGCTGAAGCGCACCCGCGCCGCTACACCCGCGCAAGAACCAGCAT  
CTGCTACCTGCAGGAGATCTTACGAACGAGATGGCCAAGGTGGACGACAGCTTCTTCCACCGCTGGAGGAGAG  
CTTCTGGTGGAGGAGACAAGAAGCAGGACCGCCACCCCATCTTCGGCAACATCGTGGACGAGGTGGCCTACCA  
CGAGAAGTACCCACCATCTACCACCTGCGCAAGAAGCTGGTGGACAGCACCGACAAGGCCGACCTGCGCCTGAT  
CTACCTGGCCCTGGCCACATGATCAAGTTCGCGGCCACTTCTGATCGAGGGGACCTGAACCCCGACAACAG  
CGAGTGGACAAGCTGTTTATCCAGCTGGTGCAGACCTACAACCAGCTGTTTCGAGGAGAACCCCATCAAGCCAG  
CGGCGTGGACGCCAAGGCCATCCTGAGCGCCCGCTGAGCAAGAGCCGCGCCCTGGAGAACCTGATCGCCAGCT  
GCCCCGGGAGAAGAAGAACCGGCTGTTTCGGCAACCTGATCGCCCTGAGCCTGGGCTGACCCCCAATTCAAGAG  
CAACTTCGACCTGGCCGAGGACGCCAAGCTGCAGCTGAGCAAGGACACCTACGACGACGACCTGGACAACCTGCT  
GGCCAGATCGGCGACCAGTACGCCGACCTGTTCTGGCCGCAAGAACCTGAGCGACGCCATCCTGCTGAGCGA  
CATCCTGCGCGTGAACACCGAGATCACCAAGGCCCCCTGAGCGCCAGCATGATCAAGCGCTACGACGAGCACCA  
CCAGGACCTGACCCTGCTGAAGGCCCTGGTGCGCCAGCAGCTGCCCGAGAAGTACAAGGAGATCTTCTTCGACCA  
GAGCAAGAACGGCTACGCCGGTACATCGACGGCGGCCAGCCAGGAGGAGTTCTACAAGTTCATCAAGCCCAT  
CCTGGAGAAGATGGACGGCACCGAGGAGCTGCTGGTGAAGCTGAACCGGAGGACCTGCTGCGCAAGCAGCGCAC  
CTTCGACAACGGCAGCATCCCCACCAGATCCACCTGGGCGAGCTGCACGCCATCCTGCGCCGCGCAGGAGGACTT  
CTACCCCTTCTGAAGGACAACCGCGAGAAGATCGAGAAGATCCTGACCTTCGCGATCCCCTACTACGTGGGCC  
CCTGGCCCCGGCAACAGCCGCTTCGCTGGATGACCCGCAAGAGCGAGGAGACCATCACCCCTGGAACCTTCGA  
GGAGGTGGTGGACAAGGGCGCCAGCGCCAGAGCTTCATCGAGCGCATGACCAACTTCGACAAGAACCTGCCCAA  
CGAGAAGGTGCTGCCCAAGCACAGCCTGCTGTACGAGTACTTCACCGTGTACAACGAGCTGACCAAGGTGAAGTA  
CGTGACCGAGGGCATGCGCAAGCCGCTTCTGAGCGGCGAGCAGAAGAAGGCCATCGTGGACCTGCTGTTCAA  
GACCAACCGCAAGGTGACCGTGAAGCAGCTGAAGGAGGACTACTTCAAGAAGATCGAGTCTTCGACAGCGTGA  
GATCAGCGGCGTGGAGGACCGCTTCAACGCCAGCCTGGGCACCTACCACGACCTGCTGAAGATCATCAAGGACAA  
GGACTTCTGGACAACGAGGAGAACGAGGACATCCTGGAGGACATCGTGTGACCTGACCTGTTTCGAGGACCG  
CGAGATGATCGAGGAGCGCTGAAGACCTACGCCACCTGTTTCGACGACAAGGTGATGAAGCAGCTGAAGCGCCG  
CCGCTACACCGGCTGGGGCCGCTGAGCCGCAAGCTGATCAACGGCATCCGCGACAAGCAGAGCGGCAAGACCAT  
CCTGGACTTCTGAAGAGCGACGGCTTCGCCAACCGCAACTTTCATGCAGCTGATCCACGACGACAGCCTGACCTT  
CAAGGAGGACATCCAGAAGGGCCAGGTGAGCGGCCAGGGCGACAGCCTGCACGAGCACATCGCCAACCTGGCCGG  
CAGCCCCGCCATCAAGAAGGGCATCCTGCAGACCGTGAAGGTGGTGGACGAGCTGGTGAAGGTGATGGGCCGCCA  
CAAGCCCGAGAACATCGTGTGAGATGGCCCCGCGAGAACCAGACCACCCAGAAGGGCCAGAAGAACAGCCGCGA  
GCGCATGAAGCGCATCGAGGAGGGCATCAAGGAGCTGGGCAGCCAGATCCTGAAGGAGCACCCCTGGAGAACAC  
CCAGCTGCAGAACGAGAAGCTGTACCTGTACTACCTGCAGAACGGCCGCGACATGTACGTGGACCAGGAGCTGGA  
CATCAACCGCCTGAGCGACTACGACGTGGACCACATCGTGCCCCAGAGCTTCTGAAGGACGACAGCATCGACAA  
CAAGGTGCTGACCCGACGCGACAAGAACCGCGCAAGAGCGACAACGTGCCAGCGAGGAGGTGGTGAAGAAGAT  
GAAGAATACTGGCGCCAGCTGCTGAACGCCAAGCTGATCACCCAGCGCAAGTTCGACAACCTGACCAAGGCCGA  
GCGCGGCGGCTGAGCGAGCTGGACAAGGCCGGCTTTCATCAAGCGCCAGCTGGTGGAGACCCGCCAGATCACCAA  
GCACGTGGCCAGATCCTGGACAGCCGATGAACACCAAGTACGACGAGAACGACAAGCTGATCCGCGAGGTGAA  
GGTGTACACCTGAAGAGCAAGCTGGTGAAGGACTTCCGCAAGGACTTCCAGTTCATAAGGTGCGCGAGATCAA  
CAACTACCACACGCCCACGACGCCTACCTGAACGCCGTGGTGGGACCCGCCCTGATCAAGAAGTACCCCAAGCT  
GGAGAGCGAGTTCGTGTACGGGACTACAAGGTGTACGACGTGCGCAAGATGATCGCCAAGAGCGAGCAGGAGAT  
CGGCAAGGCCACCGCAAGTACTTCTTACAGCAACATCATGAACTTCTTCAAGACCGAGATCACCTGGCCAA  
CGGCGAGATCCGCAAGCGCCCCCTGATCGAGACCAACGGCGAGACCCGCGAGATCGTGTGGGACAAGGGCCGCGA  
CTTCGCCACCGTGGCAAGGTGCTGAGCATGCCCCAGGTGAACATCGTGAAGAAGACCGAGGTGCAGACCCGCGG  
CTTCAGCAAGGAGAGCATCCTGCCAAGCGCAACAGCGACAAGCTGATCGCCCGAAGAAGGACTGGGACCCCAA  
GAAGTACGGCGGCTTCGACAGCCCCACCGTGGCCTACAGCGTGTGGTGGTGGCCAAGGTGGAGAAGGGCAAGAG

CAAGAAGCTGAAGAGCGTGAAGGAGCTGCTGGGCATCACCATCATGGAGCGCAGCAGCTTCGAGAAGAACCCCAT  
CGACTTCCTGGAGGCCAAGGGCTACAAGGAGGTGAAGAAGGACCTGATCATCAAGCTGCCCAAGTACAGCCTGTT  
CGAGCTGGAGAACGGCCGCAAGCGCATGCTGGCCAGCGCCGCGAGCTGCAGAAGGGCAACGAGCTGGCCCTGCC  
CAGCAAGTACGTGAACCTTCTGTACCTGGCCAGCCACTACGAGAAGCTGAAGGGCAGCCCCGAGGACAACGAGCA  
GAAGCAGCTGTTCTGTGGAGCAGACAAGCACTACCTGGACGAGATCATCGAGCAGATCAGCGAGTTCAGCAAGCG  
CGTGATCCTGGCCGACGCCAACCTGGACAAGGTGCTGAGCGCCTACAACAAGCACCCGCGACAAGCCCATCCGCGA  
GCAGGCCGAGAACATCATCCACCTGTTACCCCTGACCAACCTGGGCGCCCCCGCCGCTTCAAGTACTTCGACAC  
CACCATCGACCGCAAGCGCTACACCAGCACCAAGGAGGTGCTGGACGCCACCCTGATCCACCAGAGCATCACCGG  
CCTGTACGAGACCCGCATCGACCTGAGCCAGCTGGGCGGCGACAGCCGCGCCGACCCCAAGAAGAAGCGCAAGGT  
GTGAATCGATAAAAATAAAGATTTTATTTAGTCTCCAGAAAAAGGGGGAATGAAAGACCCACCTGTAGGTTTG  
GCAAGCTAGCTTAAGTAACGCCATTTTGAAGGCATGGAAAAATACATAACTGAGAATAGAGAAGTTCAGATCAA  
GGTCAGGAACAGATGGAACAGCTGAATATGGGCCAAAACAGGATATCTGTGGTAAGCAGTTCCTGCCCCGGCTCAG  
GGCCAAGAACAGATGGAACAGCTGAATATGGGCCAAAACAGGATATCTGTGGTAAGCAGTTCCTGCCCCGGCTCAG  
GGCCAAGAACAGATGGTCCCCAGATGCGGTCCAGCCCTCAGCAGTTTCTAGAGAACCATCAGATGTTTCCAGGGT  
GCCCCAAGGACCTGAAATGACCCTGTGCCTTATTTGAACTAACCAATCAGTTCGCTTCTCGCTTCTGTTCCGCGG  
CTTCTGCTCCCCGAGCTCAATAAAAGAGCCACAACCCCTCACTCGGGCGCCAGTCTCCGATTGACTGAGTCG  
CCCCGGTACCCGTGTATCCAATAAACCCCTTTGCAGTTGCATCCGACTTGTGGTCTCGCTGTTCCCTGGGAGGGT  
CTCCTCTGAGTGATTGACTACCCGTACCGGGGGTCTTTCATTTCCGACTTGTGGTCTCGCTGCCTGGGAGGGT  
CTCCTCTGAGTGATTGACTACCCGTACCGGGGGTCTTTCACATGCAGCATGTATCAAAATTAATTTGGTTTTTTT  
TCTTAAGTATTTACATTAATGGCCATAGTTGCATTAATGAATCGGCCAACGCGGGGAGAGCGGTTTGGCGTA  
TTGGCGCTCTTCCGCTTCTCGCTCACTGACTCGCTGCGCTCGTTCGGCTGCGGCGAGCGGTATCAGTCA  
CTCAAAGCGGTAATACGGTTATCCACAGAATCAGGGGATAACGCAGGAAAGAACATGTGAGCAAAAAGGCCAGCA  
AAAGGCCAGGAACCGTAAAAAGGCCGCTTGTGGCGTTTTTCCATAGGCTCCGCCCCCTGACGAGCATCACAA  
AAATCGACGCTCAAGTCAGAGGTGGCGAAACCCGACAGGACTATAAAGATACCAGGCGTTTTCCCCCTGGAAGCTC  
CCTCGTGCGCTCTCCTGTTCCGACCCCTGCCGTTACCGGATACCTGTCCGCTTTCTCCCTTCGGGAAGCGTGGC  
GCTTTCTCATAGCTCACGCTGTAGGTATCTCAGTTCCGTGTAGTTCGTTCCGCTCCAAGCTGGGCTGTGTGCACGA  
ACCCCCGTTTCCGCGACCCGCTGCGCCTTATCCGGTAACTATCGTCTTGAGTCCAACCCGTTAAGACACGACTT  
ATCGCCACTGGCAGCAGCCACTGGTAAACAGGATTAGCAGAGCGAGGTATGTAGGCGGTGCTACAGAGTTCCTGAA  
GTGGTGGCCTAACTACGGCTACACTAGAAGGACAGTATTTGGTATCTGCGCTCTGCTGAAGCCAGTTACCTTCGG  
AAAAAGAGTTGGTAGCTCTTGATCCGGCAAAACAAACCACCCGCTGGTAGCGGTGGTTTTTTTTGTTTGAAGCAGCA  
GATTACGCGCAGAAAAAAGGATCTCAAGAAGATCCTTTGATCTTTTCTACGGGGTCTGACGCTCAGTGAACGA  
AAACTCACGTTAAGGGATTTTGGTCATGAGATTATCAAAAAAGGATCTTACCTAGATCCTTTTAAATTAATAATG  
AAGTTTGGCGCCGAAATCAATCTAAAGTATATATGAGTAAACTTGGTCTGACAGTTACCAATGCTTAATCAGTG  
AGGCACCTATCTCAGCGATCTGTCTATTTGTTTCATCCATAGTTGCCTGACTCCCCGTCTGTAGATAACTACGA  
TACGGGAGGGCTTACCATCTGGCCCCAGTGCTGCAATGATACCGCGAGACCCACGCTCACCGGCTCCAGATTTAT  
CAGCAATAAACCAGCCAGCCGGAAGGGCCGAGCGCAGAAGTGGTCTGCAACTTTATCCGCCTCCATCCAGTCTA  
TTAATTGTTGCCGGAAGCTAGAGTAAGTAGTTCCGCCAGTTAATAGTTTGGCAACGTTGTTGCCATTGCTACAG  
GCATCGTGGTGTACGCTCGTCTTTGGTATGGCTTCATTCAGCTCCGGTCCCAACGATCAAGGCGAGTTACAT  
GATCCCCATGTTGTGAAAAAAGCGGTTAGCTCCTTCGGTCTCCGATCGTTGTCAGAAGTAAGTTGGCCGAG  
TGTTATCACTCATGGTTATGGCAGCACTGCATAATTCTCTTACTGTCATGCCATCCGTAAGATGCTTTTTCTGTGA  
CTGGTGAAGTACTCAACCAAGTCATTCTGAGAATAGTGTATGCGGCGACCGAGTTGCTCTTGGCCGGCGTCAACAC  
GGGATAATACCGCGCCACATAGCAGAACTTTAAAAGTGCTCATCATTGGAAAACGTTCTTCCGGGGCGAAAACCTCT  
CAAGGATCTTACCGCTGTTGAGATCCAGTTCGATGTAACCCACTCGTGCACCCAACCTGATCTTCAGCATCTTTTA  
CTTTACCAGCGTTTCTGGGTGAGCAAAAACAGGAAGGCAAAAATGCCGCAAAAAGGGGAATAAGGGCGACACGGA  
AATGTTGAATACTCATACTCTTCTTTTTCAATATTATTGAAGCATTATCAGGGTTATTGTCTCATGAGCGGAT  
ACATATTTGAATGTATTTAGAAAAATAAACAAATAGGGTTCCGCGCACATTTCCCCGAAAAGTGCCAC
